# Supplementary material for: The binding of Borealin to microtubules underlies a tension independent kinetochore-microtubule error correction pathway
Source: Nat Commun. 2019 Feb 8;10:682. doi: 10.1038/s41467-019-08418-4 (PMC6368601; doi:10.1038/s41467-019-08418-4)
Supplement: Supplementary file 1 — Supplementary Information [file 41467_2019_8418_MOESM1_ESM.pdf]

## **Supplementary Information**

**The binding of Borealin to microtubules underlies a tension independent kinetochore-microtubule error correction pathway**

(Trivedi et. al.)

**Supplementary Table 1: PCR primer sequences for site directed mutagenesis**

| <b>Mutagenesis primers</b> | <b>Sequence (5' to 3')</b>                    | <b>Purpose</b>                       |
|----------------------------|-----------------------------------------------|--------------------------------------|
| Bordel2-20fw               | TAAGAAGGAGATATACCATGCTCGCCTCCTTTCTGAAAG       | Deletion of 2-20 amino acid          |
| Bordel2-20rv               | CTTTCAGAAAGGAGGCGAGCATGGTATATCTCCTTCTTA       | Deletion of 2-20 amino acid          |
| BorMTBMfw                  | AGGAGGCGAGCTCCTCCCTCTCTAAGGAGTTGGTCTTGGCCACCC | Mutating amino acids 17,19,20 to E's |
| BorMTBMrv                  | GGGTGGCCAAGACCAACTCCTTAGAGAGGGAGGAGCTCGCCTCCT | Mutating amino acids 17,19,20 to E's |
| BorT230Efw                 | GCAAAGAGATCTTCCTCGAGGTGCCAGTGGGCGGCGG         | Mutating T230 to E                   |
| BorT230Er                  | CCGCCGCCCACTGGCACCTCGAGGAAGATCTCTTTGC         | Mutating T230 to E                   |

**Supplementary Table 2: PCR primer sequences for cloning**

| Cloning primers        | Sequence (5' to 3')                        | Purpose                                            |
|------------------------|--------------------------------------------|----------------------------------------------------|
| pET28aINCENP1-58fw     | GCCGCGCGGCAGCCATATGGGGACGACG<br>GCCCCAGG   | Cloning INCENP in pET28a                           |
| pET28aINCENP1-58rv     | GCTCGAATTCGGATCTCATTTGGGCATCAG<br>CTCTGGCT | Cloning INCENP in pET28a                           |
| pET28aBorflfw          | AAGAAGGAGATATACCATGGCTCCTAGGAA<br>GGGCAG   | Cloning Borealin in pET28a                         |
| pET28aBorflrv          | GACGGAGCTCGAATTTCAATTTGTGGGTCCG<br>TATGC   | Cloning survivin in pET28a                         |
| pET28aSurvivinflw      | AAGAAGGAGATATACCATGGGTGCCCCGA<br>CGTTGCC   | Cloning survivin in pET28a                         |
| pET28aSurvivinflrv     | GACGGAGCTCGAATTTCAATCCATGGCAGC<br>CAGCT    | Cloning survivin in pET28a                         |
| pET28atricisborfw      | TAAGCAGAGCTCTAATTTTGTTTAACTTTAA<br>G       | Cloning Borealin in pET28a INCENP                  |
| pET28atricisborrv      | TGCTTAAAGCTTTCAATTTGTGGGTCCGTAT<br>GC      | Cloning Borealin in pET28a INCENP                  |
| pET28atricissurvivinfw | TAATCAGCGGCCGCTAATTTTGTTTAACTTT<br>AAG     | Cloning survivin in pET28a INCENP,<br>Borealin     |
| pET28atricissurvivinrv | TGATTACTCGAGTCAATCCATGGCAGCCAG<br>CT       | Cloning survivin in pET28a INCENP,<br>Borealin     |
| pET28aPRC1fw           | TAAGCAGAATTCATGGTGGATCGGTTGGAA<br>GAACTG   | Cloning PRC1 MTBD in pET28a                        |
| pET28aPRC1rv           | TGCTTAGCGGCCGCCCCGGTGTATTGGGAG<br>CCAG     | Cloning PRC1 MTBD in pET28a                        |
| pET28aPRC1Borfw        | TAAGCAGCGGCCGCTCGCCTCCTTTCTG<br>AAAGAC     | Cloning Borealin downstream of PRC1<br>MTBD pET28a |

|                     |                                                           |                                                                            |
|---------------------|-----------------------------------------------------------|----------------------------------------------------------------------------|
| pET28aPRC1Borr      | TGCTTACTCGAGTTATTTGTGGGTCCGTAT<br>GCTGCT                  | Cloning Borealin downstream of PRC1<br>MTBD pET28a                         |
| Gtwprcborfw         | GGGGACAAGTTTGTACAAAAAAGCAGGCTT<br>CATGGTGGATCGGTTGGAAGAAC | Gateway primers to make donor vector<br>for PRC1-Borealin                  |
| Gtwprcborrv         | GGGGACCACTTTGTACAAGAAAGCTGGGT<br>CTTATTTGTGGGTCCGTATGCTGC | Gateway primers to make donor vector<br>for PRC1-Borealin                  |
| pBabemchborbamh1fw  | TCTAGGCGCCGCGCGATCCATGGTGAGC<br>AAGGGCGAGG                | Cloning mcherry borealin in pBabe-<br>puro                                 |
| pBabemchborecor1rv  | CTGTGCTGGCGAATTCTCATTTGTGGGTCC<br>GTATGCTG                | Cloning mcherry borealin in pBabe-<br>puro                                 |
| pdnrincenp747-918fw | GGGGACAAGTTTGTACAAAAAAGCAGGCTT<br>CAAGGAGCAGCTGCAGAGG     | Cloning INCENP748-918 in pDonr221                                          |
| pdnrincenp918rv     | GGGGACCACTTTGTACAAGAAAGCTGGGT<br>CTCAGTGCTTCTTCAGGCTGT    | Cloning INCENP748-918 in pDonr221                                          |
| CMVmchborfw         | GTGGGCTCTATGGTTAGCCCATATATGGAG<br>TTCCG                   | Cloning CMV-mch-borealin in TO-<br>LAP-CENPB-INCENP747-918-<br>pCDNA5-FRT  |
| CMVmchBorr          | TCCGCCTCAGAAGTTCCATAGAGCCCACC<br>GCAT                     | Cloning CMV-mch-borealin in TO-<br>LAP-CENPB-INCENP747-918--<br>pCDNA5-FRT |
| ISBGFPfw            | GCCGCGCGGCAGCCATATGGTGAGCAAGG<br>GCGAGGA                  | Cloning GFP in pET28a ISB tricistronic<br>vector using coldfusion cloning  |
| ISBGFPrv            | GGCCGTCGTCCCATATGCTTGTACAGCTC<br>GTCCATGC                 | Cloning GFP in pET28a ISB tricistronic<br>vector using coldfusion cloning  |

**Supplementary Table 3: Sequences of siRNA used in this study:**

| <b>siRNA</b>         | <b>Sequence</b>         | <b>Publication</b> |
|----------------------|-------------------------|--------------------|
| siBorealin 3'UTR     | AGGUAGAGCUGUCUGUUCAdTdT | 68                 |
| siLuciferase (siLuc) | CGUACGCGGAAUACUUCGAdTdT | 39                 |
| siINCENP 3'UTR       | GGCUUGGCCAGGUGUAUAUdTdT | 39                 |
| siBub1               | CCCAUUUGCCAGCUCAAGCdTdT | 69                 |

**Supplementary Table 4: Small molecules used in this study:**

| <b>Small molecules</b> | <b>Concentration / duration</b> |
|------------------------|---------------------------------|
| STLC                   | 5uM for 2hr                     |
| 5-Iodothio             | 2uM for 30-45'                  |
| MG132                  | 10uM                            |
| Nocodazole             | 0.33uM or 3.3uMfor 20-30min     |

**Supplementary Table 5: Antibodies used in the study**

| <b>Antibody</b>   | <b>Concentration</b> | <b>Application</b> | <b>Source animal</b> | <b>Company/source</b>                 | <b>Item number</b> |
|-------------------|----------------------|--------------------|----------------------|---------------------------------------|--------------------|
| pH3S10            | 1 in 800             | IF                 | Rb                   | EMD Millipore                         | 06-570             |
| pH3T3             | 1 in 1500            | IF                 | Rb                   | EMD Millipore                         | 07-424             |
| pH2a T120         | 1 in 1000            | IF                 | Rb                   | Active motif                          | 61195              |
| Sgo1              | 1 in 100             | IF                 | Ms                   | Abcam                                 | ab58023            |
| Aur-B<br>pT232    | 1 in 200             | IF                 | Rb                   | Rockland                              | 600-401-677S       |
| Aurora-B          | 1 in 250             | IF                 | Ms                   | BD Biosciences                        | 611083             |
| Borealin          | 1 in 1000            | IF/WB              | Rb                   | Stukenberg lab <sup>35</sup><br>(986) |                    |
| INCENP            | 1 in 1000            | IF                 | Ms                   | Abcam                                 | ab23956            |
| ACA               | 1 in 200             | IF                 | Hu                   | Antibodies Inc.                       | 15-234-0001        |
| CENPA pS7         | 1 in 100             | IF                 | Rb                   | EMD Millipore                         | 07-232             |
| Dsn1 pS109        | 1 in 1000            | IF                 | Rb                   | Ian Cheeseman<br>lab <sup>17</sup>    |                    |
| Kn11 pS60         | 1 in 2000            | IF                 | Rb                   | Ian Cheeseman<br>lab <sup>17</sup>    |                    |
| Hec1 pS44         | 1 in 1500            | IF                 | Rb                   | Deluca lab <sup>15</sup>              |                    |
| Hec1 pS55         | 1 in 250             | IF                 | Rb                   | Stukenberg lab<br>(974)               |                    |
| Hec1 pS69         | 1 in 1000            | IF                 | Rb                   | Stukenberg lab<br>(975)               |                    |
| Hec1<br>(9G3.23)  | 1 in 2000            | IF                 | Rb                   | Genetex                               | GTX70268           |
| Kn11              | 1 in 1000            | IF                 | Rb                   | Arshad Desai lab <sup>67</sup>        |                    |
| Bub1              | 1 in 1000            | WB                 | Rb                   | Genetex                               | GTX30097           |
| mCherry           | 1 in 1000            | WB                 | Rb                   | Genetex                               | GTX128508          |
| INCENP            | 1 in 1000            | WB                 | Rb                   | Sigma                                 | I5283              |
| Survivin          | 1 in 1000            | WB                 | Rb                   | cell signaling                        | 2808               |
| Tubulin<br>(Dm1a) | 1 in 500             | IF/WB              | Ms                   | Sigma                                 | T6199              |

**Supplementary Table 6. Model parameters.**

| symbol                 | Description                                                                                                                                                      | value                 | units               |
|------------------------|------------------------------------------------------------------------------------------------------------------------------------------------------------------|-----------------------|---------------------|
| Binding constants      |                                                                                                                                                                  |                       |                     |
| $k_{on}^{MT}$          | Association rate constant for kinase to microtubules                                                                                                             | 2.9                   | $\mu M^{-1} s^{-1}$ |
| $k_{on}^{chrom}$       | Association rate constant for kinase to chromatin binding sites                                                                                                  | 2.9                   | $\mu M^{-1} s^{-1}$ |
| $k_{off}^{MT}$         | Dissociation rate constant for kinase from microtubules                                                                                                          | 0.3                   | $s^{-1}$            |
| $k_{off}^{chrom}$      | Dissociation rate constant for kinase from chromatin binding sites                                                                                               | 0.014                 | $s^{-1}$            |
| Enzymatic constants    |                                                                                                                                                                  |                       |                     |
| $k_f^a$                | rate constant for the formation of the enzyme-substrate complex of active and partially active kinase molecules in case at least one of the molecules is soluble | 0.1                   | $\mu M^{-1} s^{-1}$ |
| $k_f^b$                | rate constant for the formation of the enzyme-substrate complex of active and partially active kinase molecules in case both molecules are chromatin-bound       | 0.001                 | $\mu M^{-1} s^{-1}$ |
| $k_f^T$                | rate constant for the formation of the enzyme-substrate complex of active and partially active kinase molecules in case both molecules are microtubule-bound     | 0.001                 | $\mu M^{-1} s^{-1}$ |
| $k_r^a$                | rate constant for the dissociation of the enzyme-substrate complex of active and partially active soluble kinase molecules                                       | 5.1                   | $s^{-1}$            |
| $k_r^b$                | rate constant for the dissociation of the enzyme-substrate complex of active and partially active chromatin-bound kinase molecules                               | 0.21                  | $s^{-1}$            |
| $k_r^T$                | rate constant for the dissociation of the enzyme-substrate complex of active and partially active kinase molecules in case both molecules are microtubule-bound  | 0.21                  | $s^{-1}$            |
| $k_{cat}^a$            | catalytic rate constant for active soluble or chromatin-bound kinase toward all forms of the partially active kinase                                             | 2.3                   | $s^{-1}$            |
| $k_{cat}^{MT}$         | catalytic rate constant for active microtubule-bound kinase toward all forms of the partially active kinase                                                      | 4.6                   | $s^{-1}$            |
| $k_{cis}$              | rate constant for kinase cis-activation, all forms                                                                                                               | $7.28 \times 10^{-6}$ | $s^{-1}$            |
| $k_f^p$                | rate constant for the formation of the enzyme-substrate complex of phosphatase and active kinase, all forms                                                      | 0.6                   | $\mu M^{-1} s^{-1}$ |
| $k_r^p$                | rate constant for the dissociation of the enzyme-substrate complex of phosphatase and active kinase, all forms                                                   | 0.09                  | $s^{-1}$            |
| $k_{cat}^p$            | catalytic rate constant for phosphatase toward active kinase, all forms                                                                                          | $6 \times 10^{-3}$    | $s^{-1}$            |
| Other model parameters |                                                                                                                                                                  |                       |                     |
| $D$                    | diffusion coefficient of soluble kinase                                                                                                                          | 1                     | $\mu m^2 s^{-1}$    |
| $D_{MT}$               | diffusion coefficient of microtubule-bound kinase                                                                                                                | 0.1                   | $\mu m^2 s^{-1}$    |
| $PPase_0$              | total concentration of phosphatase                                                                                                                               | 0.282                 | $\mu M$             |
| $A_{sol}$              | total concentration of soluble kinase                                                                                                                            | 0.01                  | $\mu M$             |
| $MT^{total}$           | Total concentration of CPC binding sites on microtubules                                                                                                         | 5                     | $\mu M$             |
| $B_0$                  | Peak concentration of CPC binding sites on chromatin                                                                                                             | 30                    | $\mu M$             |

# Supplementary Figure 1

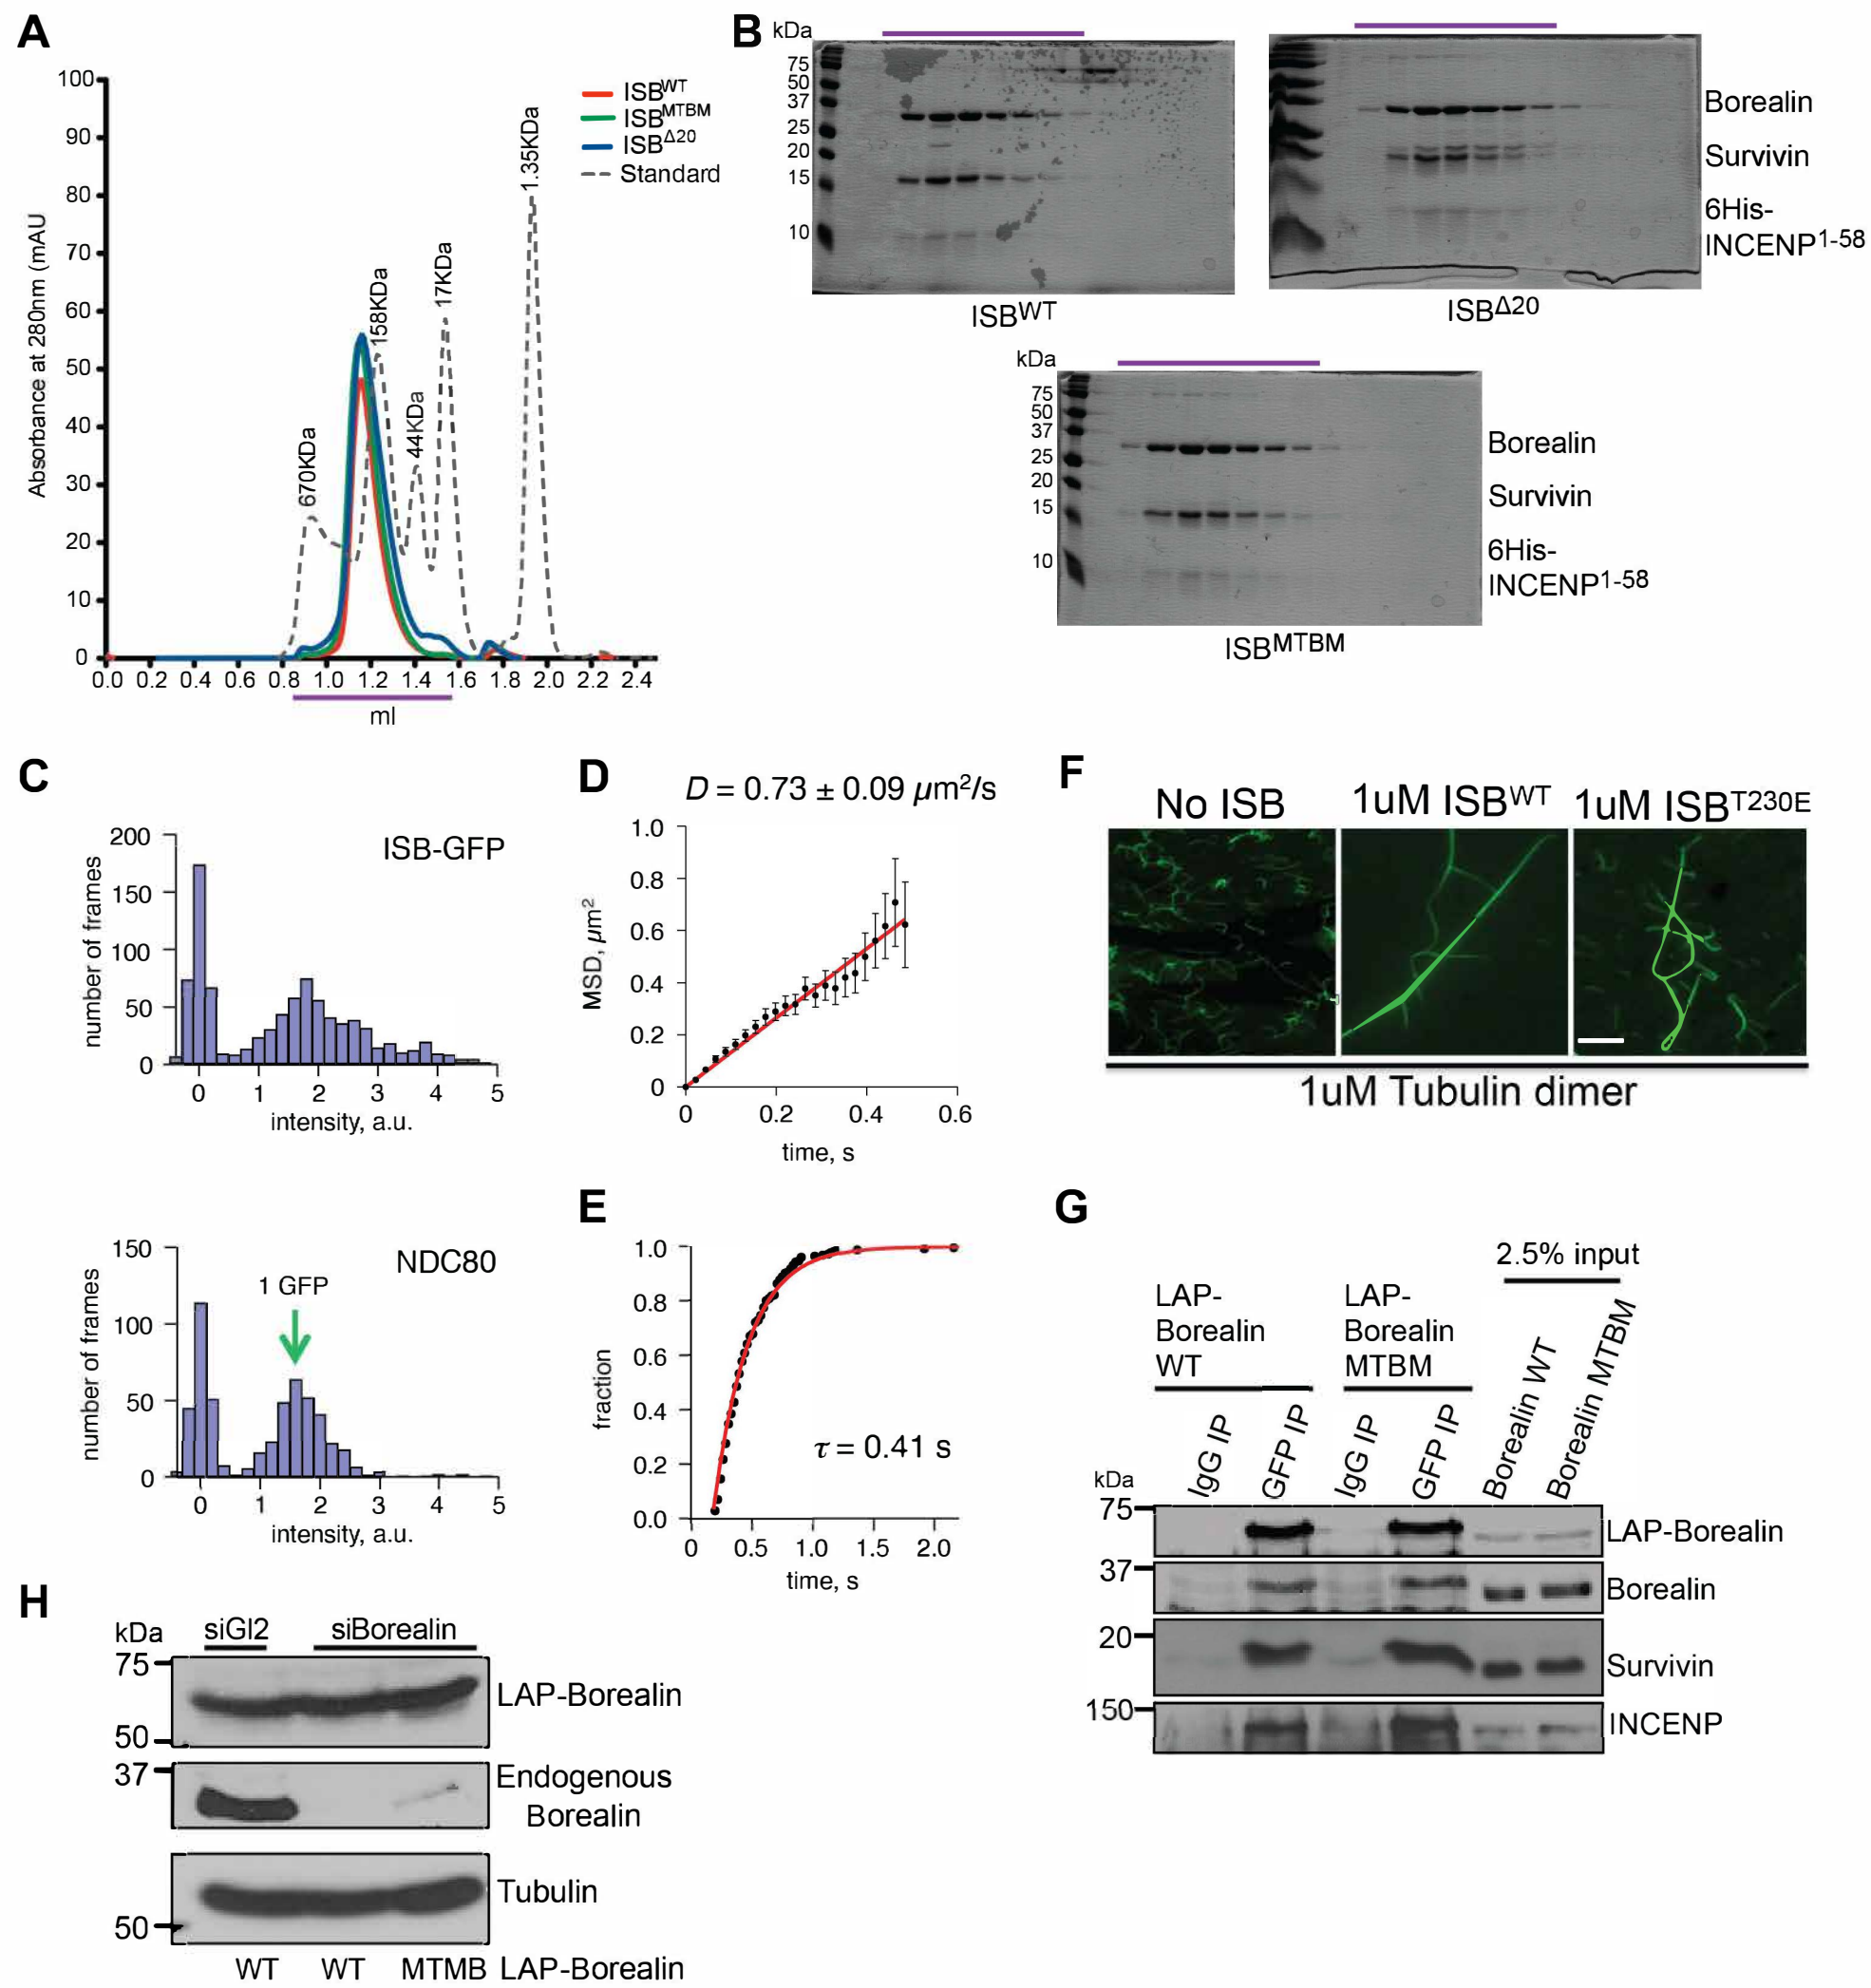

**Supplementary Figure 1: The microtubule binding mutations of Borealin have no effect on the ISB or the CPC complex formation.** (A) Graph of the FPLC gel-filtration run on a superdex S-200 column. ISB<sup>WT</sup> (red), ISB<sup>MTBM</sup> (green), ISB<sup>Δ20</sup> (Blue) and FPLC standard (dashed line). (B) Coomassie stained gel of the fractions from the gel filtration run shown in A, purple line on the graph in A and on the coomassie stained gel images indicates the fractions from the FPLC gel-filtration that were loaded on the gel. (C) Histogram distribution of brightness of individual tracks from experiment. Peak intensity of the ISB-GFP signals coincides with that for the NDC80 complex, suggesting that ISB is predominantly monomeric at this low concentration. (D) Mean squared displacement (MSD) vs. time based on 150 tracks obtained in 2 independent experiments. Displacement coordinates were binned every 22 ms; black dots show mean displacements with SEM. Red line shows linear fit. Data from experiment shown in Fig.1C (E) Cumulative distribution for residency times (based on 189 tracks), data were fitted with truncated exponential distribution (red curve, cut-off 0.16 s). Data from experiment shown in Fig.1C. (F) Images from microtubule bundling assay. ISB<sup>WT</sup> and ISB<sup>T230E</sup> were incubated with 1μM taxol stabilized microtubules and probed with anti-tubulin antibody. (G) Western blots from the immuno-precipitation experiment is shown. LAP-Borealin<sup>WT</sup> and LAP-Borealin<sup>MTBM</sup> were immuno-precipitated from the nocodazole arrested cell lysate using an anti-GFP antibody. The western blot was probed with antibodies raised against GFP, Borealin, survivin and INCENP. (H) Western blot of the whole cell lysate from the Borealin knockdown rescue experiments as described in Fig.2A. Blots were stained with anti-Borealin antibody and GFP antibody; tubulin staining was used as a loading control.

**Supplementary Figure 2**

**A**

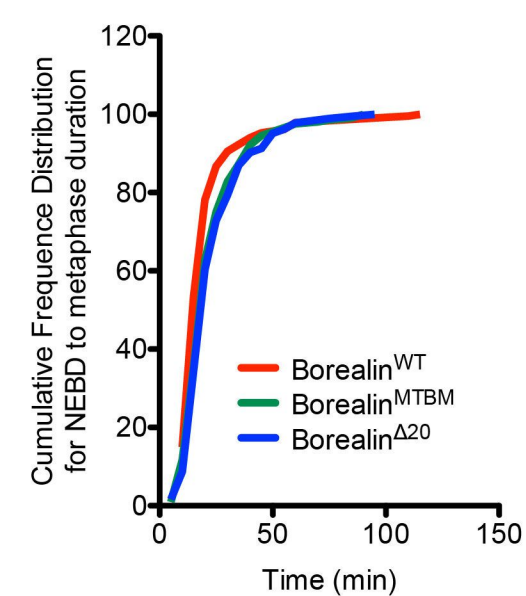

**B**

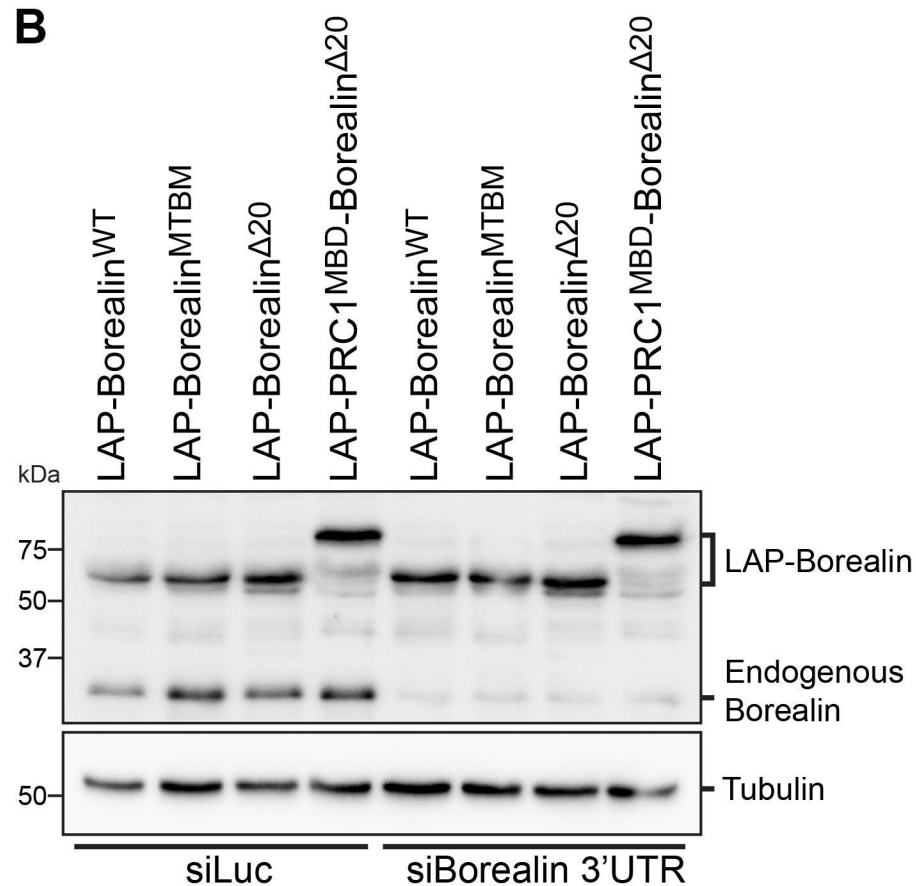

**C**

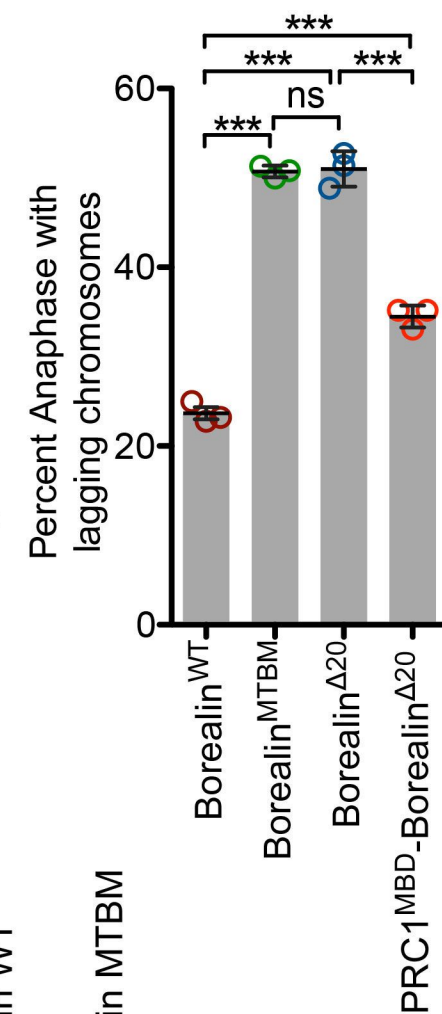

**D**

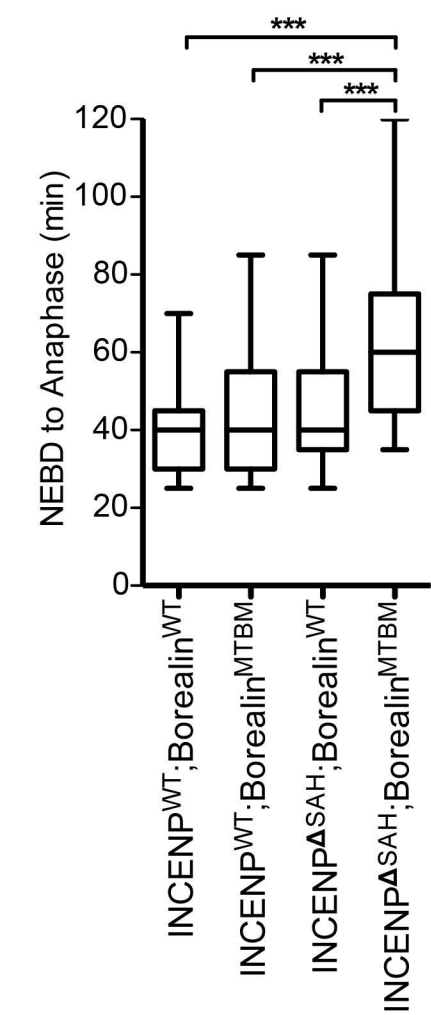

**E**

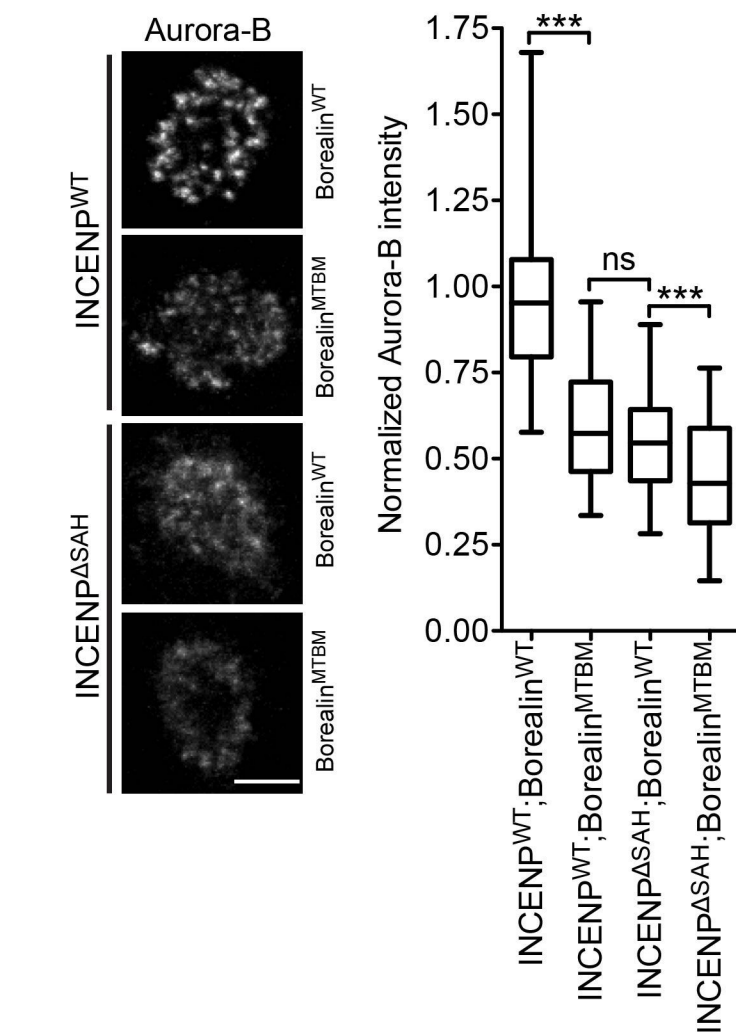

**F**

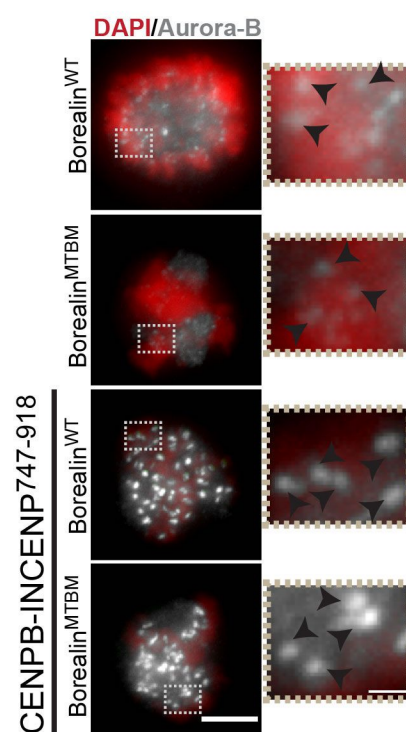

**G**

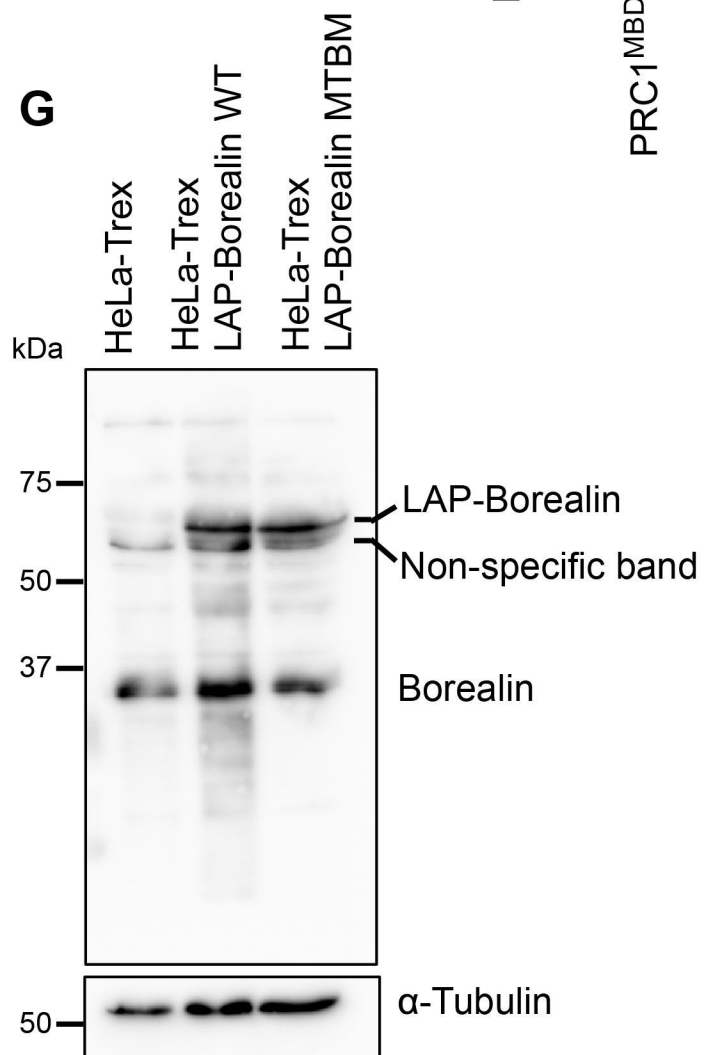

**Supplementary Figure 2: Both Borealin and INCENP microtubule binding domain**

**are important for error free mitosis.** (A) Cumulative frequency graph for duration of

NEBD to metaphase (left) or metaphase to anaphase (right) from data shown in Fig.2D.

(B) Western blots of the cells expressing the indicated transgenes and treated with

siRNA as in Fig.2A. (C) Bar graph showing percent of cells undergoing anaphase with

lagging chromosomes after STLC release assay, cells were treated as described earlier

in Fig.2A and rescued with indicated Borealin transgenes. STLC was added 6 hours post

2<sup>nd</sup> thymidine release for 2hours. STLC was then washed out and 2 hours post washout

cells were fixed (data from 3 independent experiments, at least 84 cells were analyzed

per experiment). Open circle indicates the individual data points. Error bars represent

±s.d. Statistical analysis was done using one-way ANOVA and Bonferroni's multiple

comparison test for both D and E. \*\*\* P<0.001; \*\* P<0.01, \* P<0.05. (D) Box and whisker

graph of nuclear envelope breakdown (NEBD) to anaphase duration for experiment

shown in Fig.2E. Statistical analysis was performed using Dunn's Multiple Comparison

Test \*\*\* P<0.001. (E) HeLa-TReX cells expressing mcherry-Borealin WT or MTBM and

INCENP WT or ΔSAH-GFP were treated with Borealin and INCENP 3'UTR siRNA as

described in Fig.2A, and immunostained with Aurora-B antibody (Left). Box and whisker

graph of normalized Aurora-B intensity (Right). Data is from one of at least 2 replicates.

For statistical analysis two-tailed Mann Whitney test was applied (data from at least 7

cells per condition). \*\*\* P<0.0001, ns P=0.0580. (F) HeLa-TReX cells expressing

indicated exogenous proteins were treated with Borealin 3'UTR siRNA as described in

Fig.2A and 100nM paclitaxel for 1 hour before fixation, and immuno-stained with Aurora-

B antibody. Grey dashed boxes represent the area enlarged on the right. Arrowhead

points to the inner-centromeric Aurora-B localization. (G) Western blot of HeLa TReX

parental cells or cells expressing LAP-Borealin WT or MTBM stained with Borealin

antibody, showing the presence of non-specific band below the LAP-Borealin band (often seen with some batches of Borealin antibody). Tubulin staining was used as a loading control. All Box and whisker plots represent the median (central line), 25<sup>th</sup>-75<sup>th</sup> percentile (bounds of the box) and 5<sup>th</sup>-95<sup>th</sup> percentile (whiskers). Scale bar is 5um.

# Supplementary Figure 3

**A**

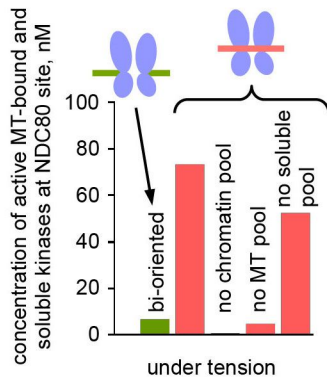

**B**

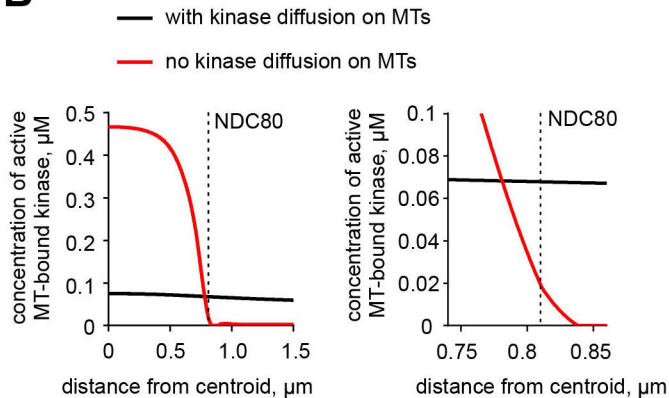

**C**

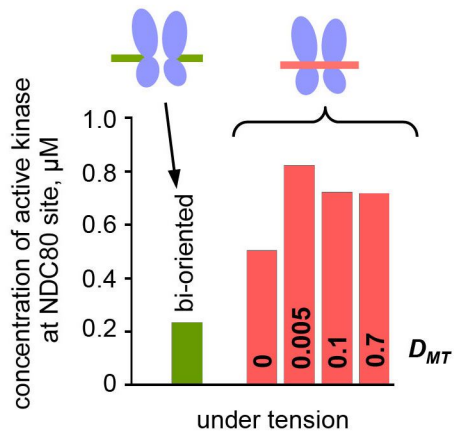

**Supplementary Figure 3: Modeling results for spatial distribution of different kinase forms.** (A) Same graph as in Fig.4G but plotting the combined activity of only microtubule-bound and soluble pools of kinase. (B) Concentration profiles of active microtubule-bound kinase at the kinetochore with centromere-proximal microtubules. Black curve shows prediction of the main model with CPC diffusion coefficient  $0.1 \mu\text{m}^2/\text{s}$ , showing a gentle gradient. Red curve is prediction for the non-diffusing CPC ( $D_{MT} = 0$ ), showing that in this case the microtubule-bound kinase is significantly more active at the centromere, where it becomes “ignited” by the chromatin-bound kinase. Right graph is an enlargement, showing that in the absence of diffusion, significantly smaller fraction of active CPC can reach the NDC80 site. (C) Quantification of the effect of diffusion of microtubule-bound kinase on the concentration of active kinase (all pools) at NDC80 site at the kinetochore with centromere-proximal microtubules.

# Supplementary Figure 4

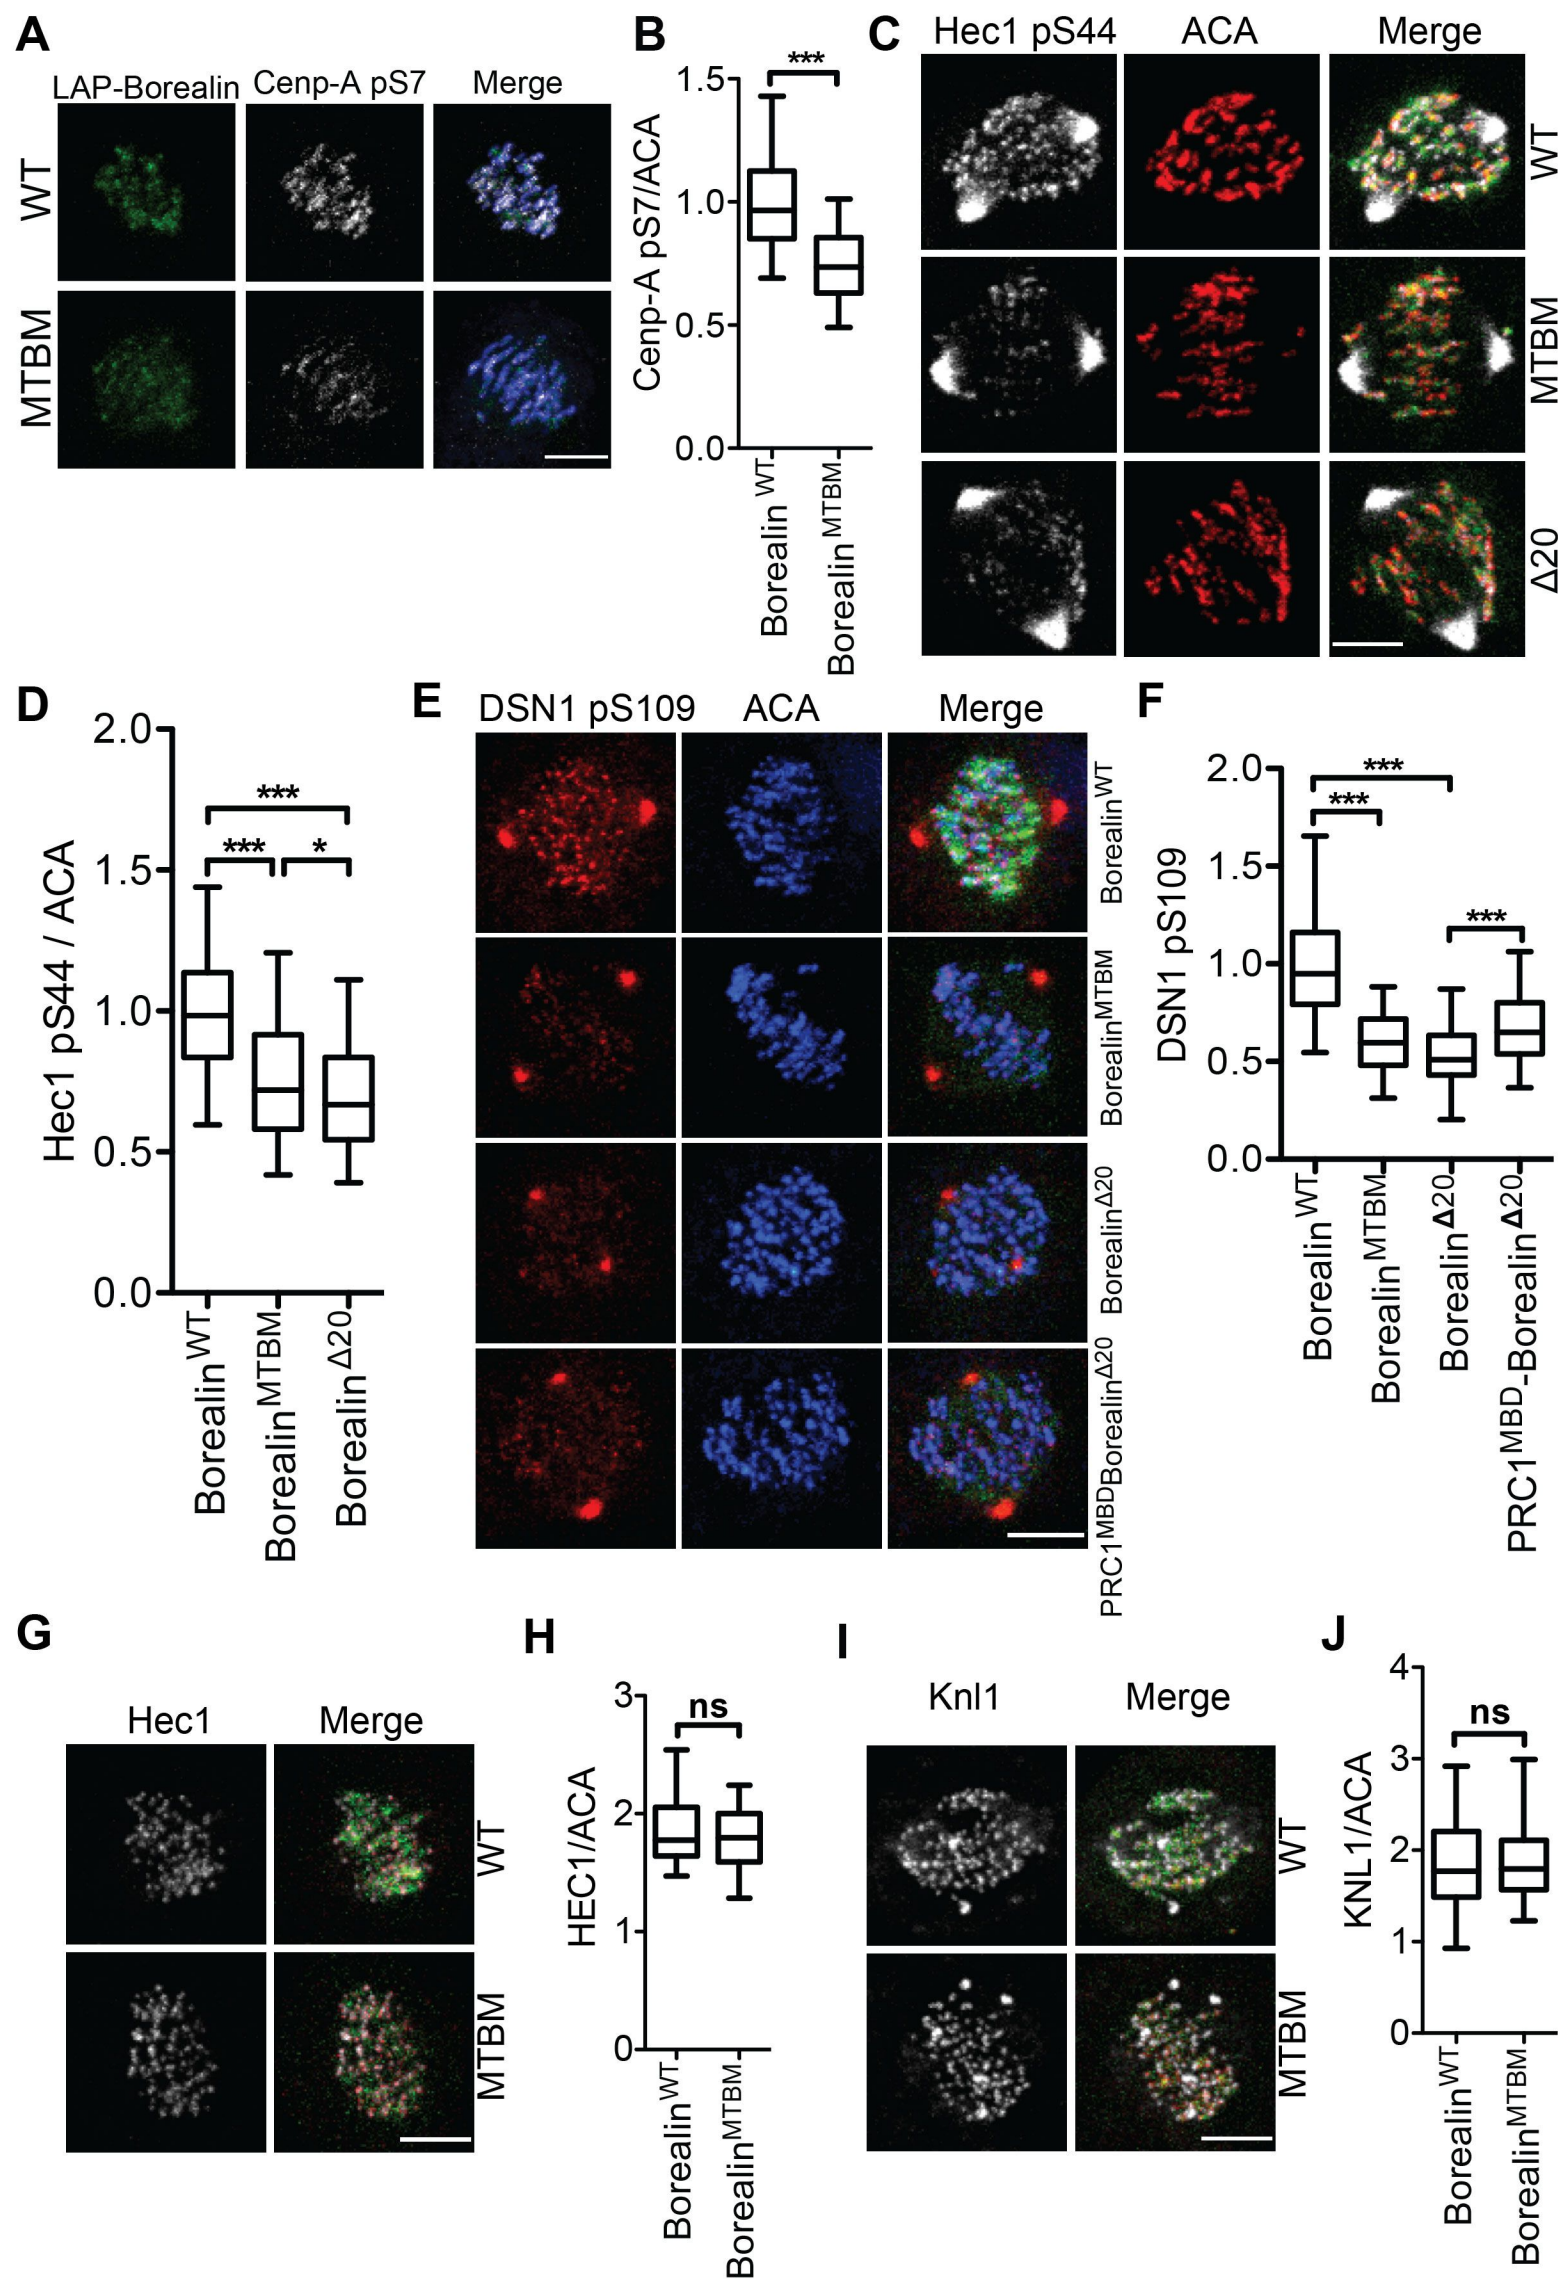

**Supplementary Figure 4: Borealin-microtubule interaction is important for robust kinetochore phosphorylation by the CPC.** (A) Cells expressing LAP-Borealin<sup>WT</sup> and LAP-Borealin<sup>MTBM</sup> were treated as shown in Fig.5A and immunostained for CenpA pS7; representative images are shown. (B) Box and whisker graph of normalized CenpA pS7 intensity (data from at least 8 cells per condition). Statistical analysis was performed using Mann Whitney Test, \*\*\* P< 0.0001. (C) Cells expressing LAP-Borealin<sup>WT</sup>, LAP-Borealin<sup>MTBM</sup> and LAP-Borealin<sup>Δ20</sup> were treated as described in Fig.5A and immunostained with Hec1 pS44. Representative images are shown. Merge image shows LAP-Borealin (green), ACA (Blue) and Hec1pS44 (grey). (D) Box and whisker graph of the normalized Hec1 pS44 intensity from C (data from at least 10 cells per condition). (E) Cells expressing LAP-Borealin<sup>WT</sup>, LAP-Borealin<sup>MTBM</sup>, LAP-Borealin<sup>Δ20</sup> and LAP-PRC1<sup>MBD</sup>-Borealin<sup>Δ20</sup> were treated with Borealin siRNA as described in Fig.5A. Cells were then immunostained with DSN1 pS109 and ACA. Representative images of the experiment are shown. Merge image shows LAP-Borealin (green), ACA (Blue) and DSN1pS109 (red). (F) Box and whisker graph of the normalized DSN1 pS109 intensity from E (data from at least 8 cells). For D and F statistical analysis was done using one way ANOVA (Kruskal-Wallis test) with Dunn's Multiple Comparison Test, \*\*\* P<0.001; \*\* P<0.01, \* P<0.05 and ns P>0.05. Cells were treated as described in Fig.5A and immunostained with Hec1 (G) or Knl1 (I); representative images are shown. Merge image shows LAP-Borealin (green), ACA (red) and Hec1 or Knl1 (grey). Box and whisker graph of normalized Hec1 (H) or Knl1 (J) intensity (data from at least 6 cells per condition). Statistical analysis was performed using Mann Whitney test for H (P=0.3131) and J (P=0.4431). Immunostaining data is from one of at least 2 replicates. All Box and whisker plots represent the median (central line), 25<sup>th</sup>-75<sup>th</sup> percentile (bounds of the box) and 5<sup>th</sup>-95<sup>th</sup> percentile (whiskers). Scale bar 5μm.

**Supplementary Figure 5**

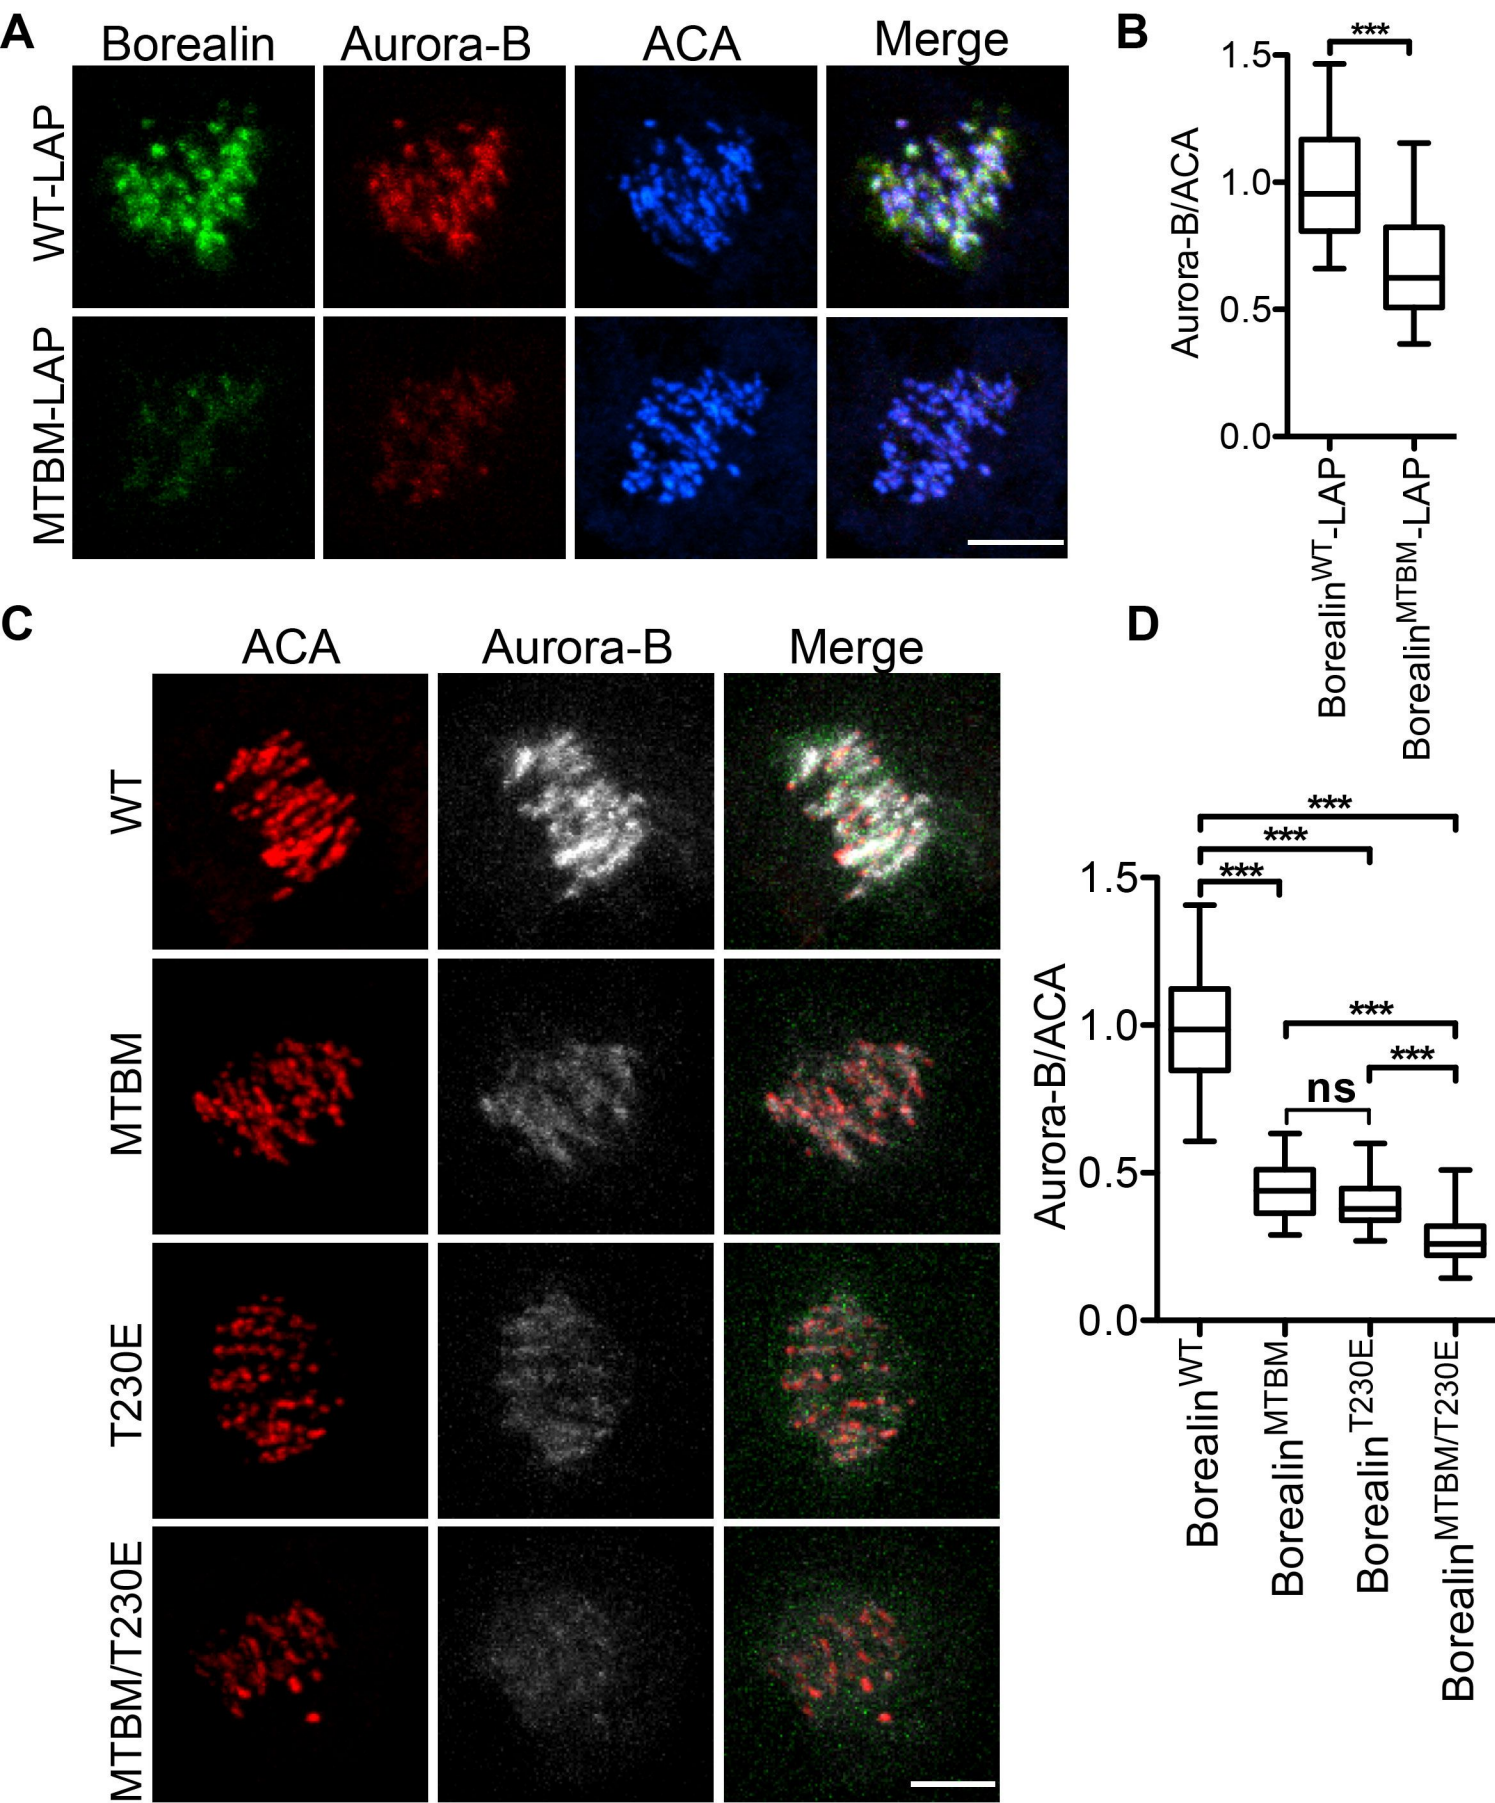

**Supplementary Figure 5: Borealin microtubule-binding domain and dimerization domain independently enhance inner-centromere localization of the CPC.** (A) Cells expressing C-terminal LAP tagged Borealin<sup>WT</sup> or Borealin<sup>MTBM</sup> were treated as in Fig.5A and immunostained with antibodies against Aurora-B and ACA. Representative images from the experiments are shown. (B) Box and whisker graph of the normalized Aurora-B intensity from A (data from at least 5 cells per condition). Statistical analysis was performed using Mann Whitney Test, \*\*\*  $P < 0.0001$ . (C) Representative images are shown from the experiment were cells expressing LAP-Borealin<sup>WT</sup>, LAP-Borealin<sup>MTBM</sup>, LAP-Borealin<sup>T230E</sup> (Borealin dimerization mutant) and LAP-Borealin<sup>MTBM/T230E</sup> were treated as in Fig.5A and immunostained with antibodies against Aurora-B and ACA. (D) Box and whisker graph of the normalized Aurora-B intensity from C (data from at least 7 cells per condition). Statistical analysis was done using one way ANOVA (Kruskal-Wallis test) with Dunn's Multiple Comparison Test, \*\*\*  $P < 0.001$ ; \*\*  $P < 0.01$ , \*  $P < 0.05$  and ns  $P > 0.05$ . Immunostaining data is from one of at least 2 replicates. All Box and whisker plots represent the median (central line), 25<sup>th</sup>-75<sup>th</sup> percentile (bounds of the box) and 5<sup>th</sup>-95<sup>th</sup> percentile (whiskers). Scale bar is 5 $\mu$ m.

# Supplementary Figure 6

**A**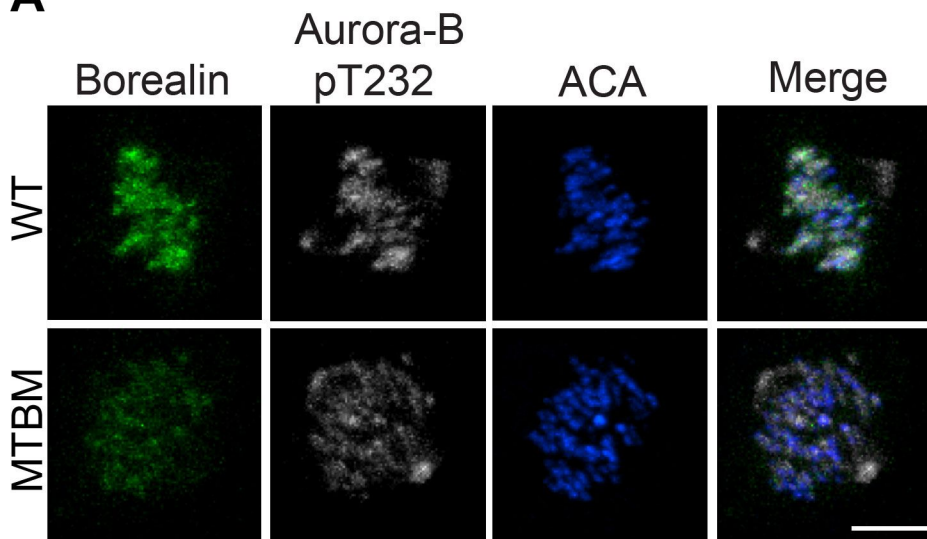**B**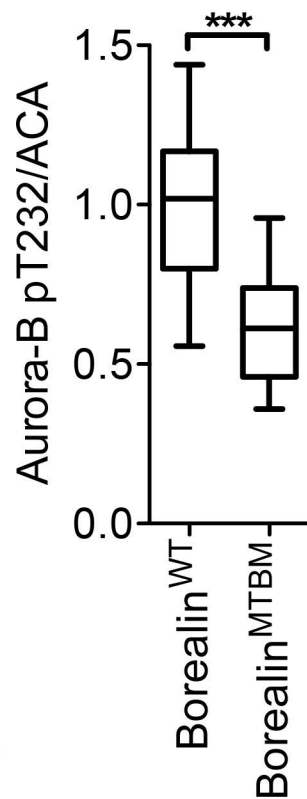**C**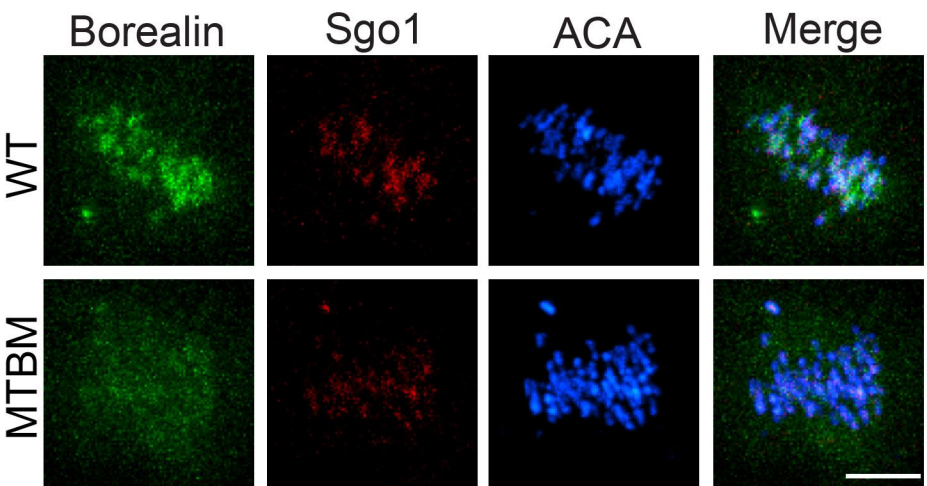**D**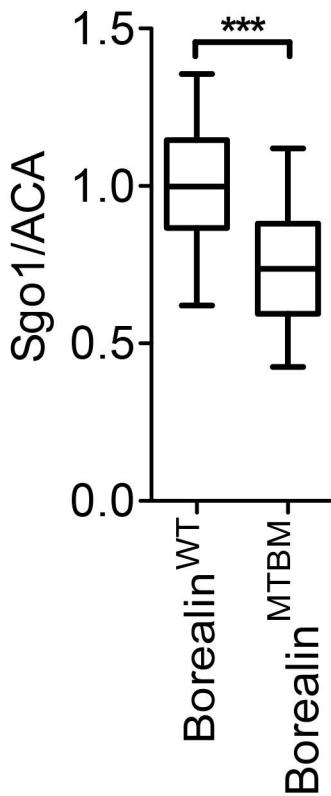

**Supplementary Figure 6: Borealin-microtubule interaction is important for proper centromeric Sgo1 localization.** Representative images are shown from the experiment where cells expressing LAP-Borealin<sup>WT</sup> and LAP-Borealin<sup>MTBM</sup> were treated as in Fig.5A and immunostained with Aurora-B pT232 (A), Sgo1 (C) and ACA. Representative images are shown in A and C. Box and whisker graph of normalized Aurora-B pT232 intensity (B) (data from at least 10 cells) and normalized Sgo1 intensity (D) (data from at least 8 cells per condition) in cells expressing LAP-Borealin<sup>WT</sup> and LAP-Borealin<sup>MTBM</sup>. Statistical analysis was performed using Mann Whitney Test, \*\*\* P< 0.0001. Immunostaining data is from one of at least 2 replicates All Box and whisker plots represent the median (central line), 25<sup>th</sup>-75<sup>th</sup> percentile (bounds of the box) and 5<sup>th</sup>-95<sup>th</sup> percentile (whiskers). Scale bar is 5µm.

**Supplementary Figure 7**

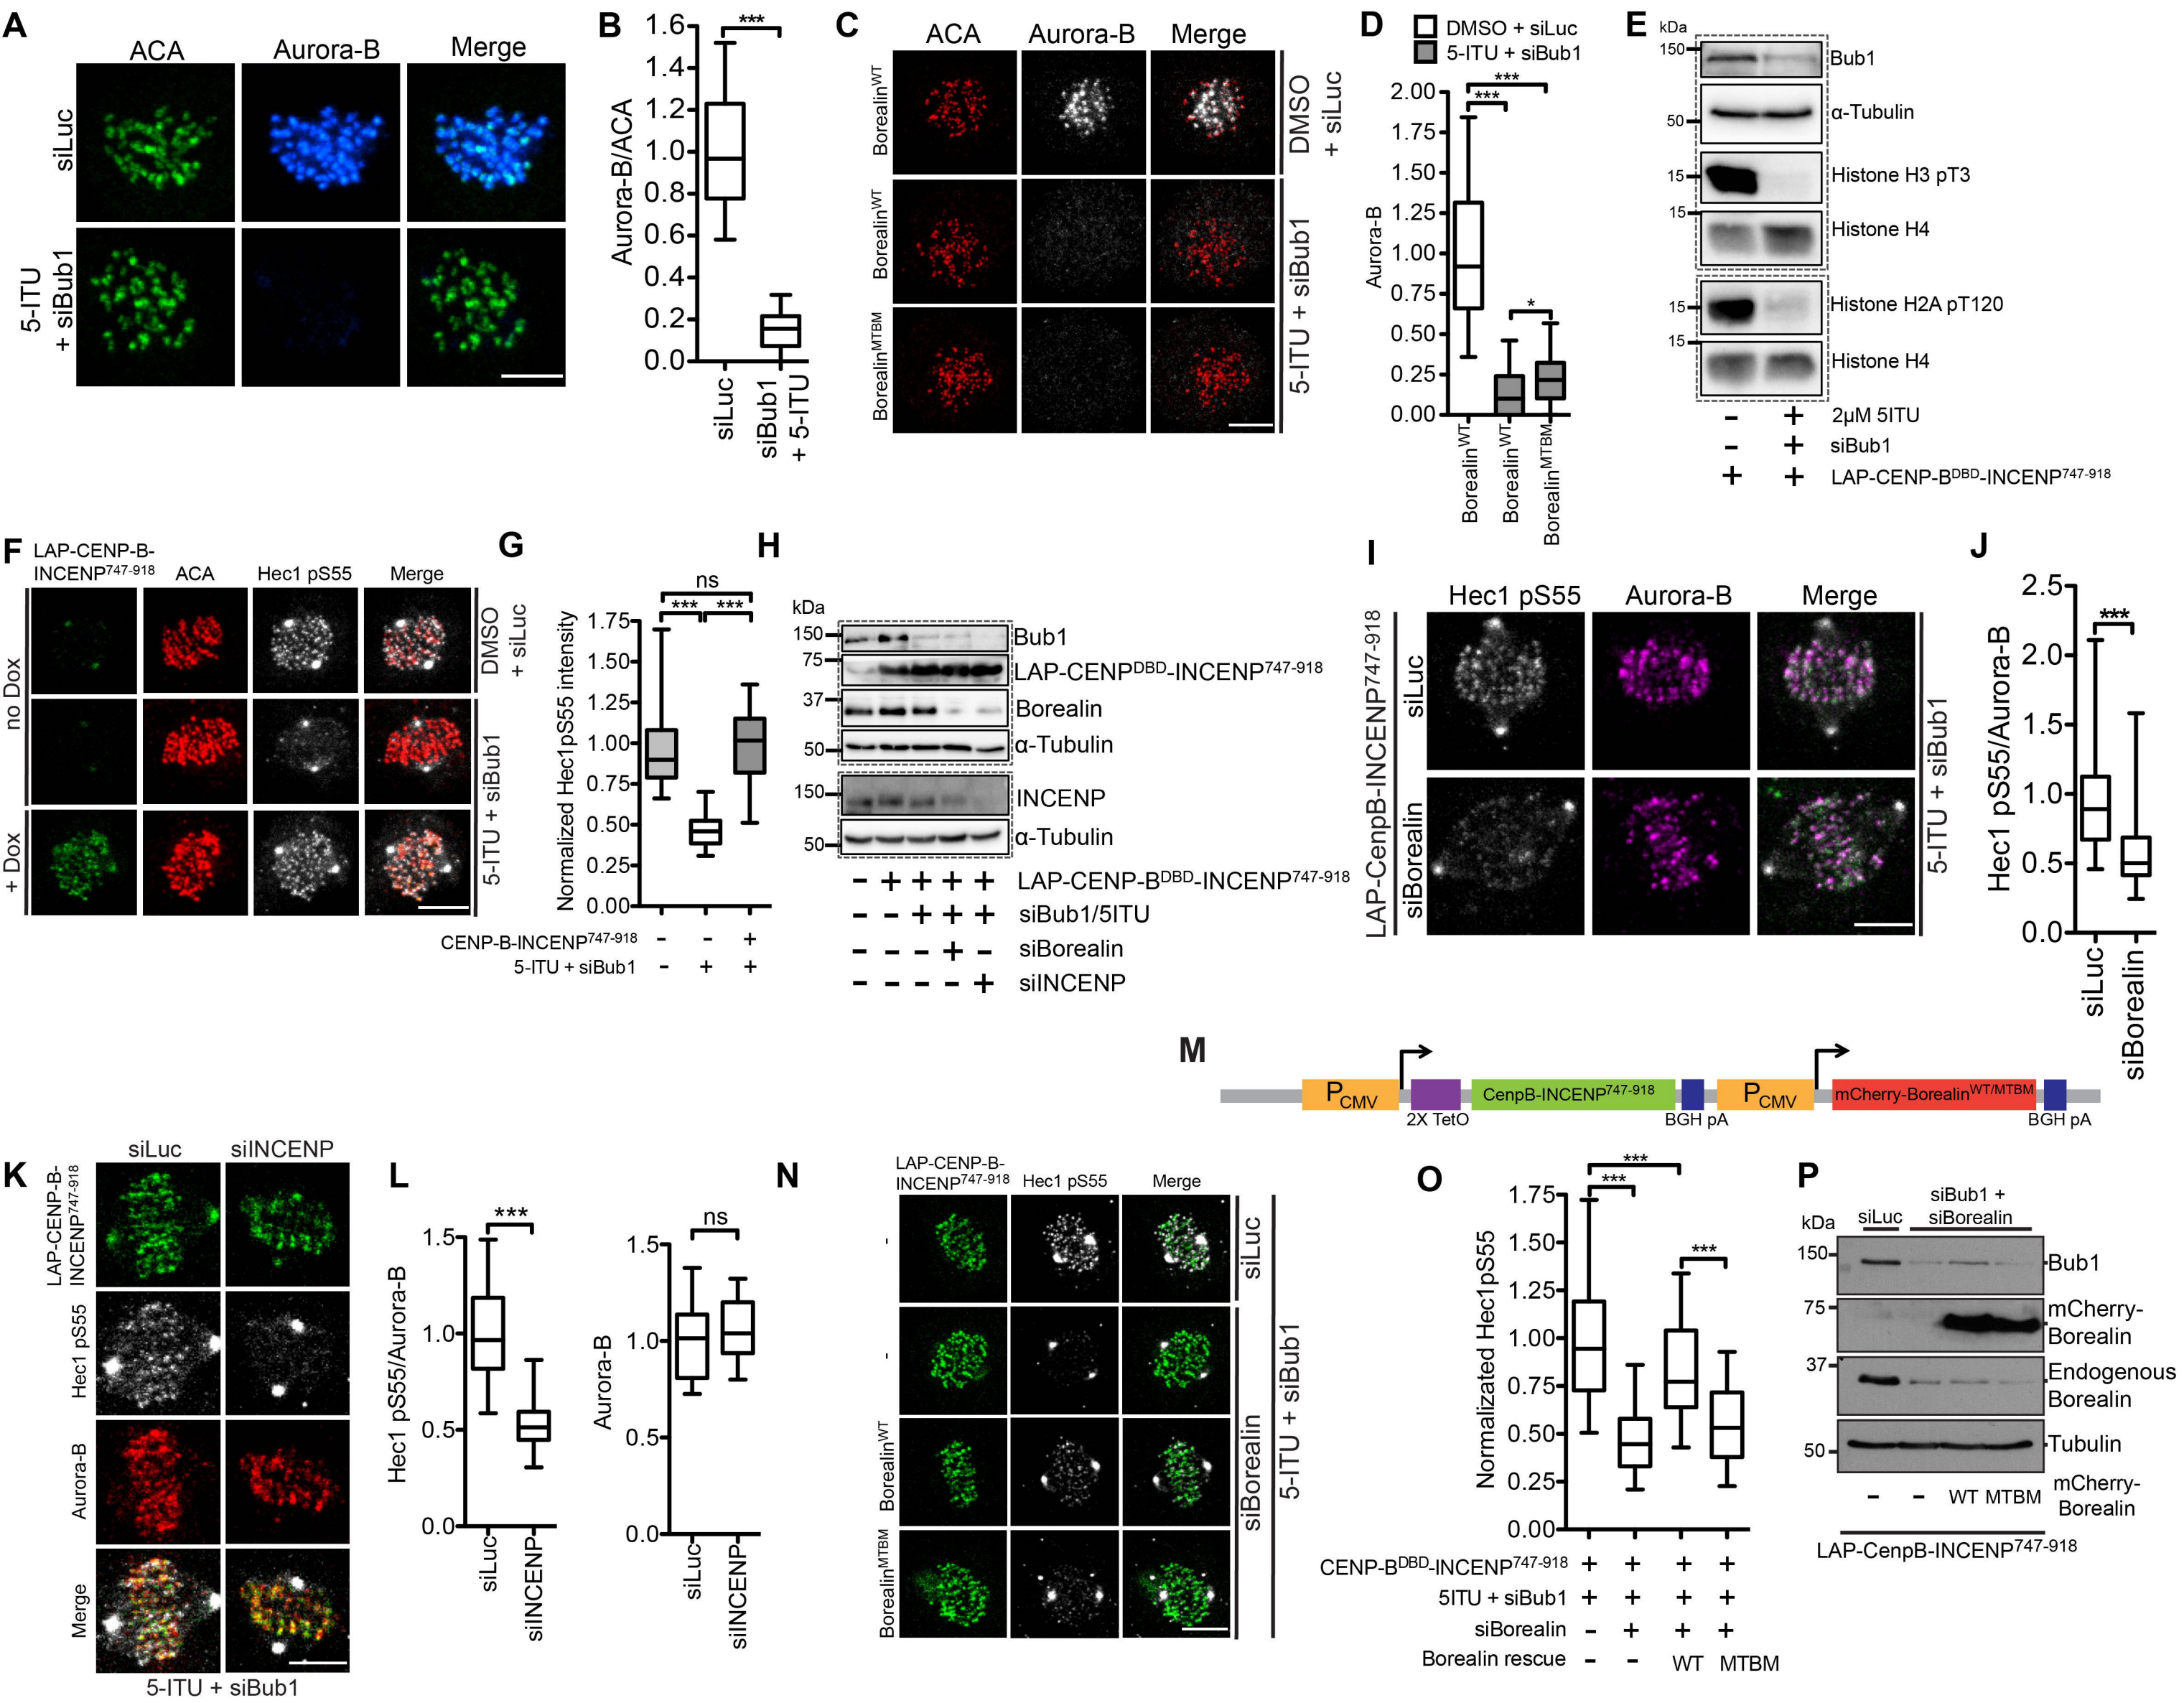

**Supplementary Figure 7: Borealin mediated non-centromeric CPC-microtubule interaction is required for robust phosphorylation of the kinetochore substrates by the CPC.** (A) HeLa-Trex cells were either treated as in Fig.8A (siBub1 and 2uM 5-ITU), with the exception of doxycycline treatment, or untreated (control). Cells were stained for Aurora-B and ACA after treatment with 3.3uM Nocodazole. (B) Box and whisker graph of normalized Aurora-B intensity from experiment shown in A (data from at least 8 cells per condition). Statistical analysis was done using Mann Whitney Test, \*\*\*  $P < 0.0001$ . Scale bar 5um. (C) HeLa TReX cells expressing the indicated transgene were treated as in supplement Fig.7A with addition of Borealin 3'UTR siRNA treatment. The cells were then stained for Aurora-B (grey) and ACA (red). (D) Box and whisker plot of the Aurora-B intensity from experiment shown in C (combined data from at least 8 cells per condition). Statistical analysis was performed using one-way ANOVA and Bonferroni's Multiple Comparison Test. \*\*\*  $P < 0.001$ ; \*  $P < 0.05$ . (E) Western blot of HeLa TReX lysates under indicated condition stained with indicated antibodies. All the blots inside the dotted box indicates antibodies probed on the same membrane, the blots in two different dotted box are the same lysates run parallel on different lanes. (F) Cells were treated as described in Fig.8A in indicated conditions followed by immunostaining with Hec1 pS55 and ACA antibodies. Representative images are shown. (G) Box and whisker graph of normalized Hec1 pS55 from experiment shown in F (combined data from at least 8 cells per condition). Statistical analysis was performed using one-way ANOVA and Bonferroni's Multiple Comparison Test. \*\*\*  $P < 0.001$ ; \*  $P < 0.05$ , ns  $P > 0.05$ . (H) Western blot of HeLa TReX lysates under indicated condition stained with indicated antibodies. All the blots inside the dotted box indicates antibodies probed on the same membrane, the blots in two different dotted box are the same lysates run parallel on different lanes. (I) Cells were treated as described in Fig.8A followed by immunostaining

with Hec1 pS55 and Aurora-B antibody. Representative images are shown. (J) Box and whisker graph of normalized Hec1 pS55 from experiment shown in I (data from at least 9 cells per condition). Statistical analysis was done using Mann Whitney Test, \*\*\*  $P < 0.0001$ . (K) Cells were treated as described in Fig.8A, instead of borealin siRNA INCENP siRNA was used, followed by immunostaining with Hec1 pS55 and Aurora-B antibodies. Representative images are shown. (L) Box and whisker graph of normalized Hec1 pS55 from experiment shown in K (combined data from at least 10 cells per condition). Statistical analysis was done using Mann Whitney Test, \*\*\*  $P < 0.0001$ , ns  $P = 0.0628$ . (M) Schematic of the construct used for making cell lines stably expressing LAP-CenpB<sup>DBD</sup>-INCENP<sup>747-918</sup> under doxycycline induction and constitutively expressing mcherry-Borealin<sup>WT or MTBM</sup>. (N) Cells were treated as described in Fig.8E followed by immunostaining with Hec1 pS55. Representative images are shown. (O) Box and whisker graph of normalized Hec1 pS55 from experiment shown in N (combined data from at least 7 cells per condition). Statistical analysis was performed using one-way ANOVA and Bonferroni's Multiple Comparison Test. \*\*\*  $P < 0.001$ . (H) Western blot showing Borealin and Bub1 knockdown and expression of mCherry-Borealin<sup>WT or MTBM</sup> transgene in cells expressing LAP-CenpB-INCENP<sup>747-918</sup>. Tubulin blot is used as loading control. Immunostaining data is from one of at least 2 replicates. All Box and whisker plots represent the median (central line), 25<sup>th</sup>-75<sup>th</sup> percentile (bounds of the box) and 5<sup>th</sup>-95<sup>th</sup> percentile (whiskers). Scale bar is 5 $\mu$ m for all the images except for images in K where it is 4 $\mu$ m.

# Supplementary Figure 8

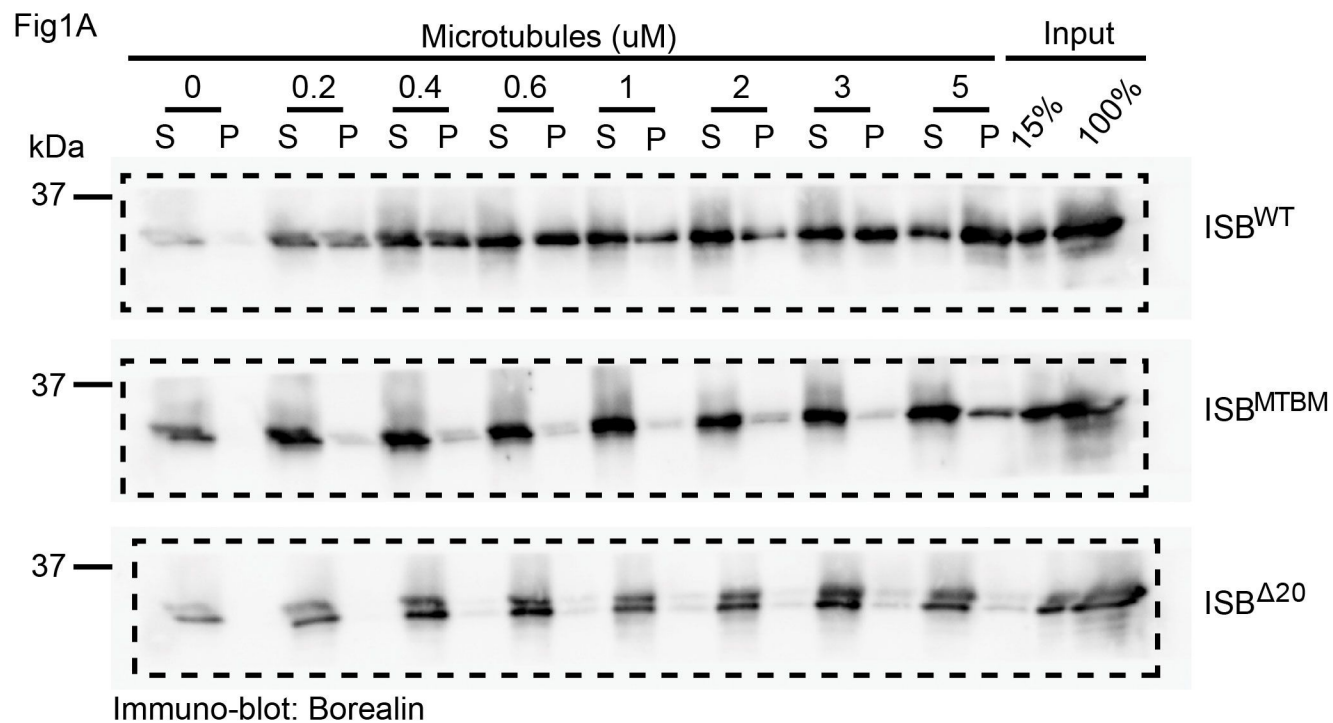

Supplement Fig 1G

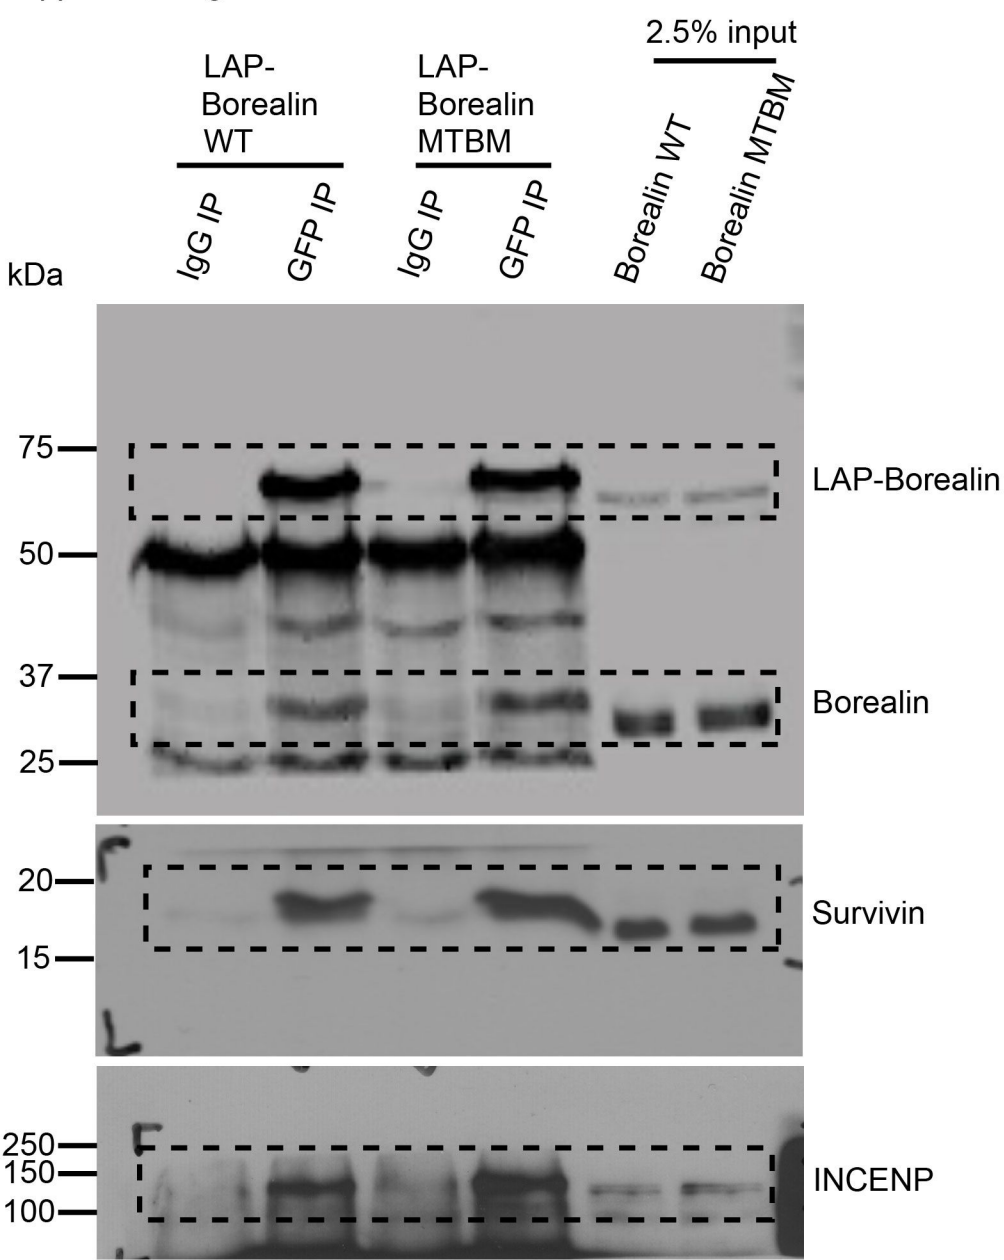

Supplement Fig 1H

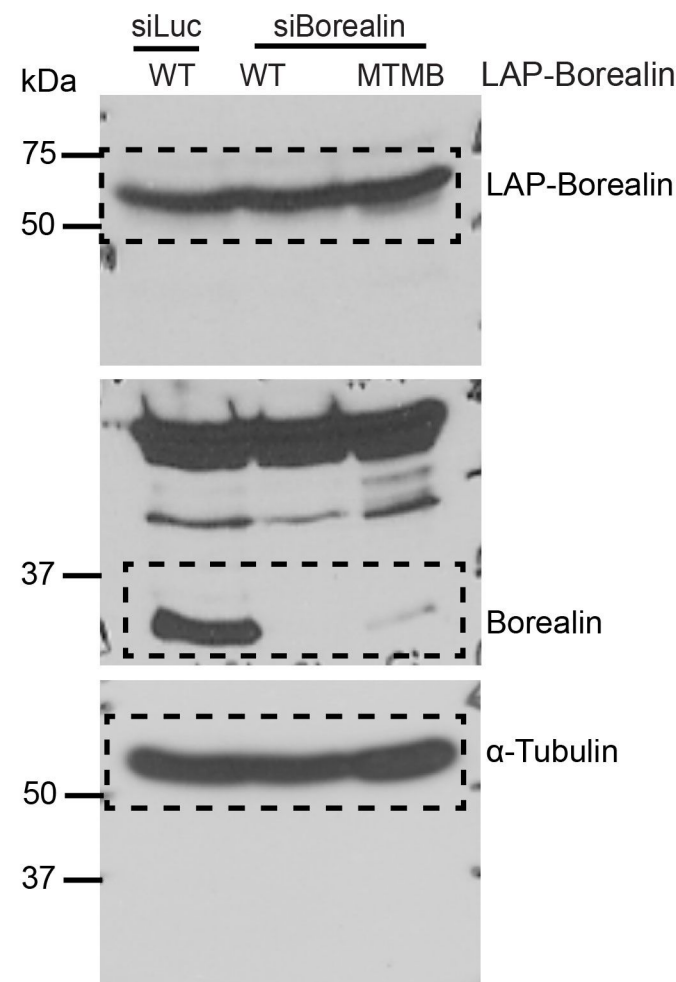

**Supplementary Figure 8: Uncropped scans of blots from Fig.1A, Supplement Fig.1G and H.**

# Supplementary Figure 9

Fig 2C

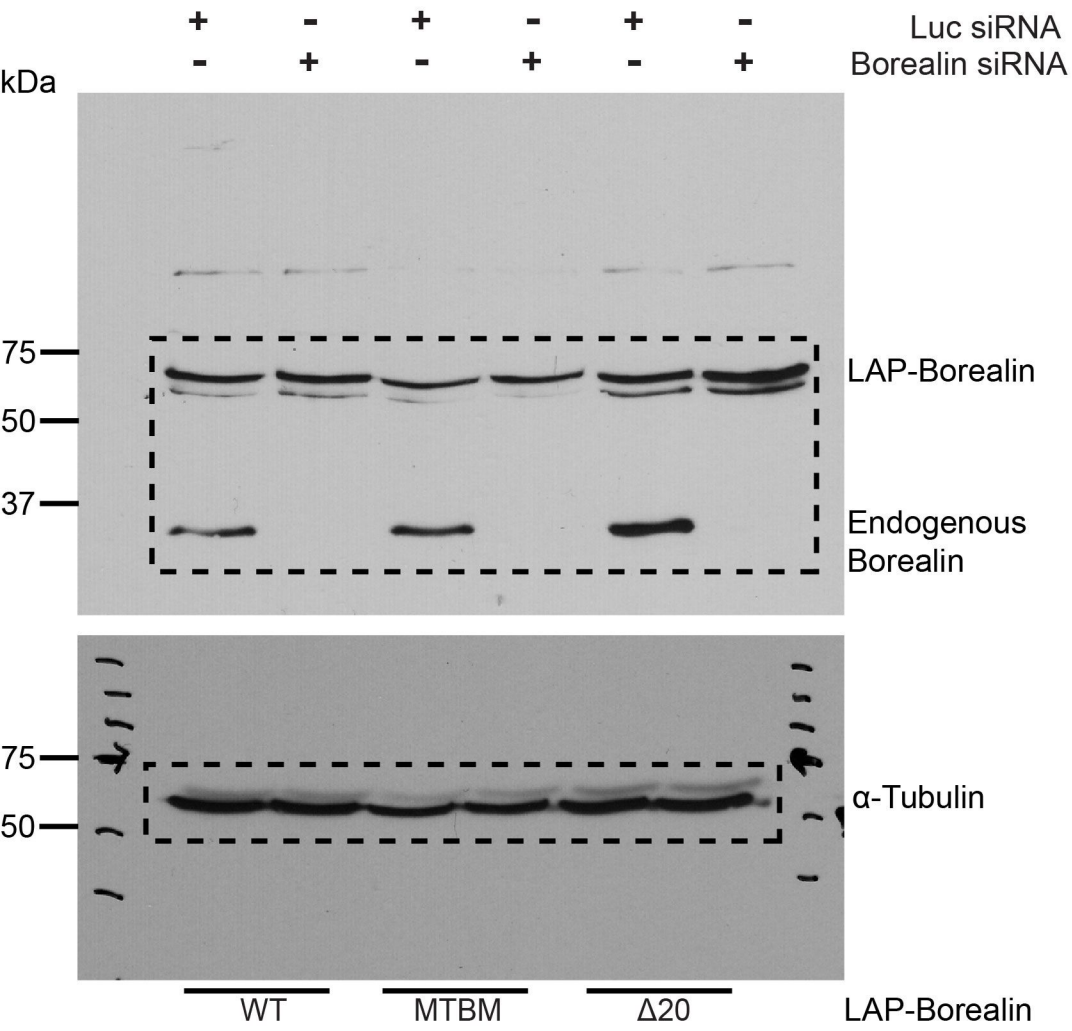

Supplement Fig 2B

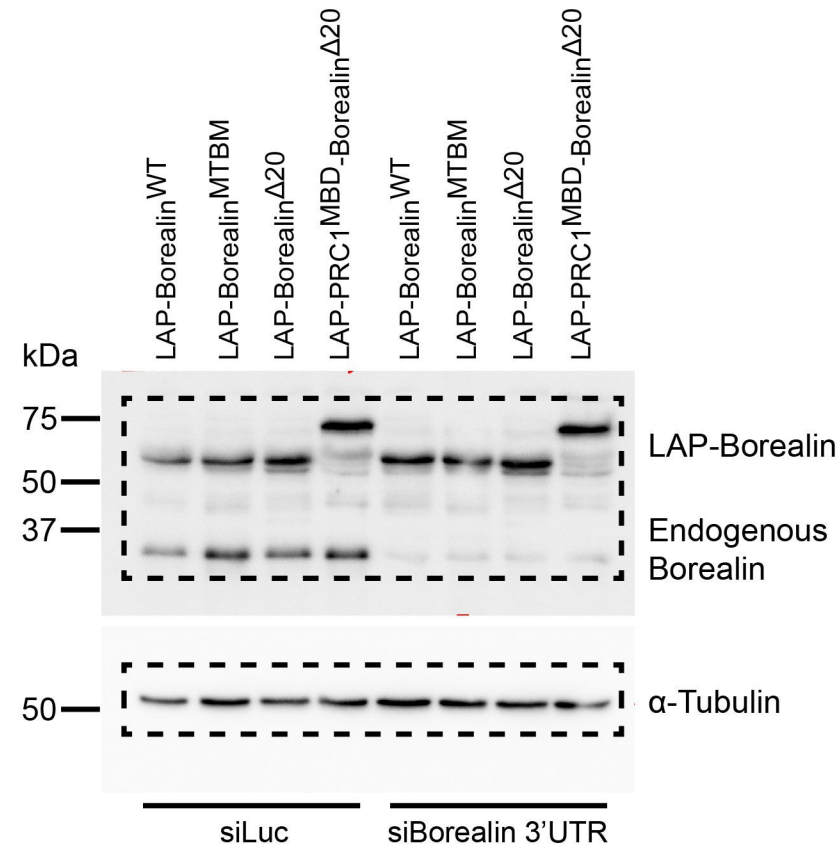

**Supplementary Figure 9: Uncropped scans of blots from Fig.2C, Supplement Fig.2B.**

Supplementary Figure 10

Supplement Fig 7E

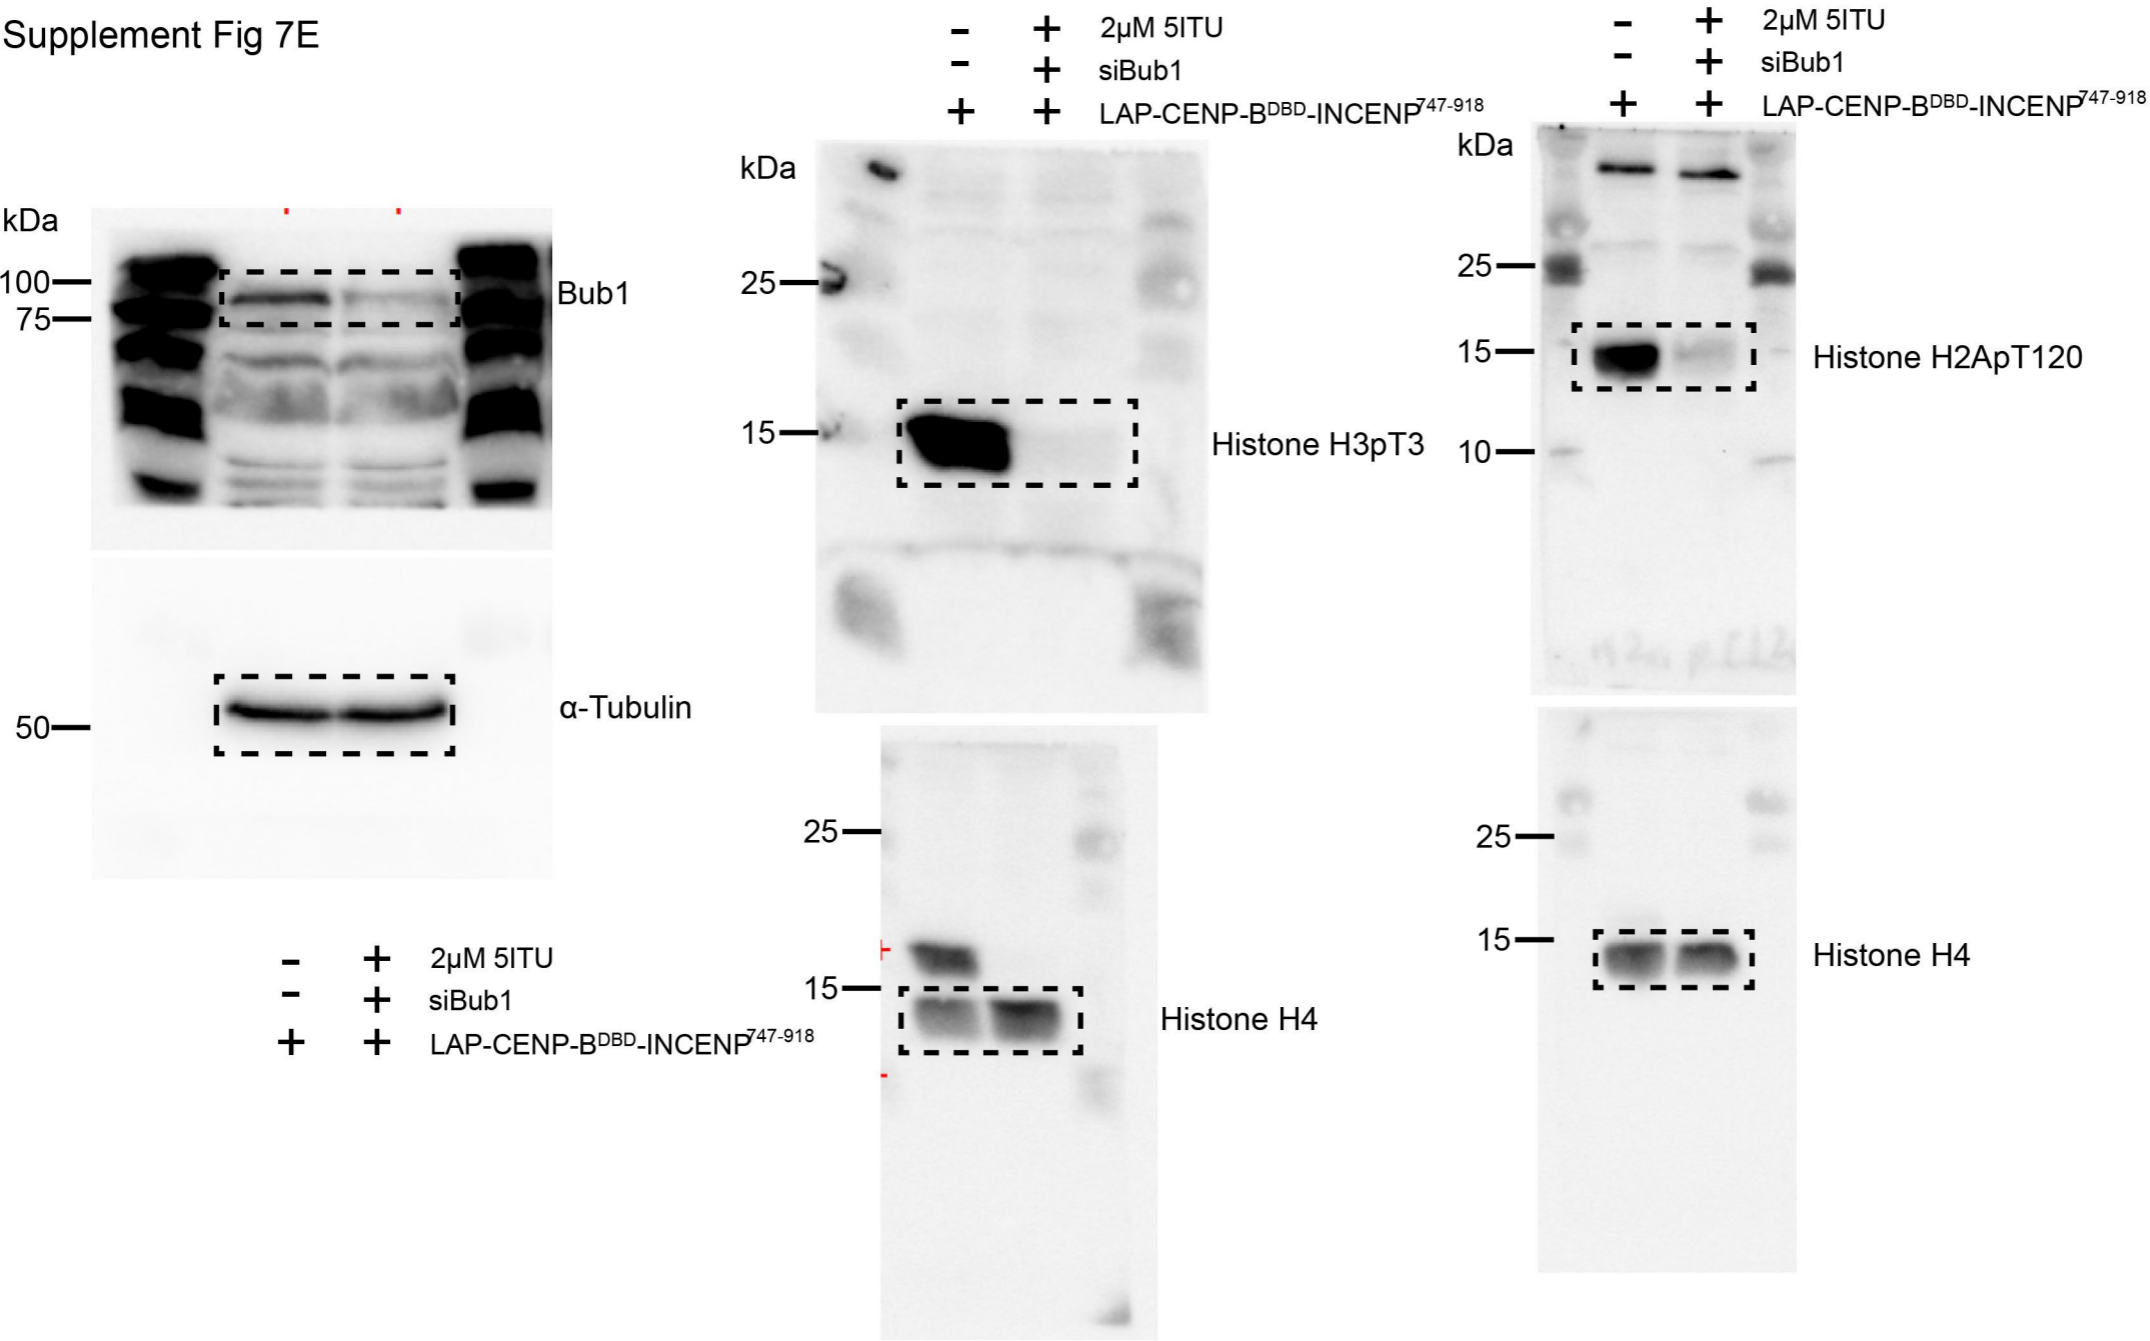

Supplement Fig 7H

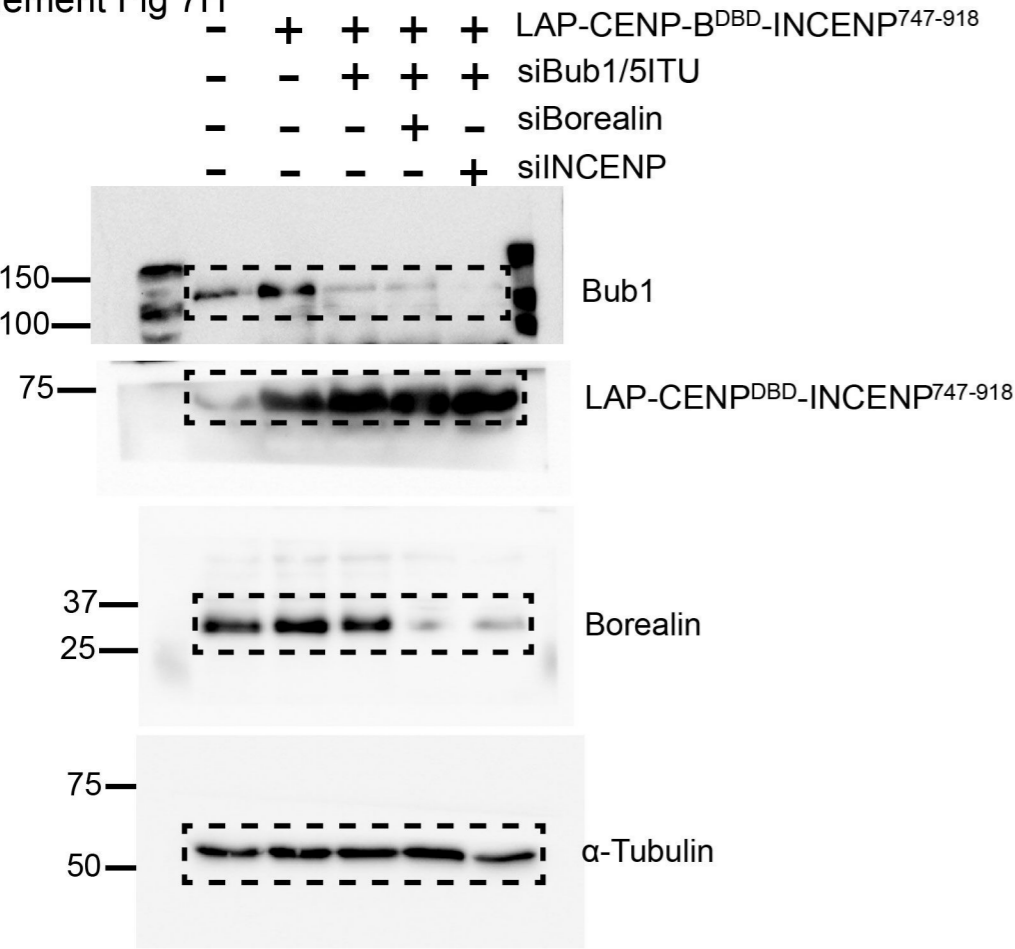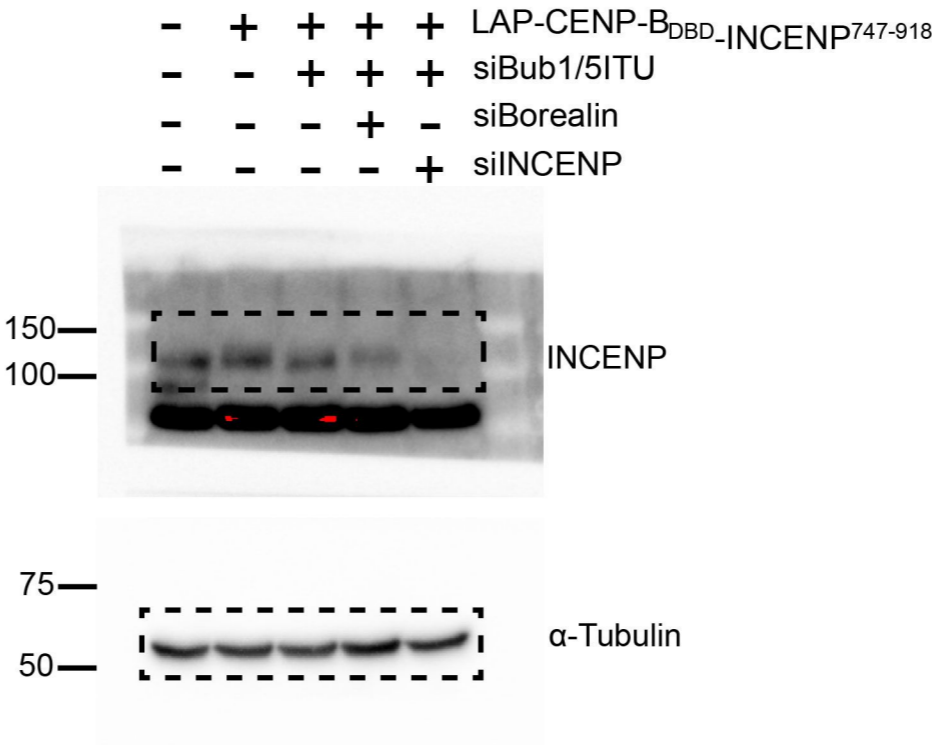

Supplement Fig 7P

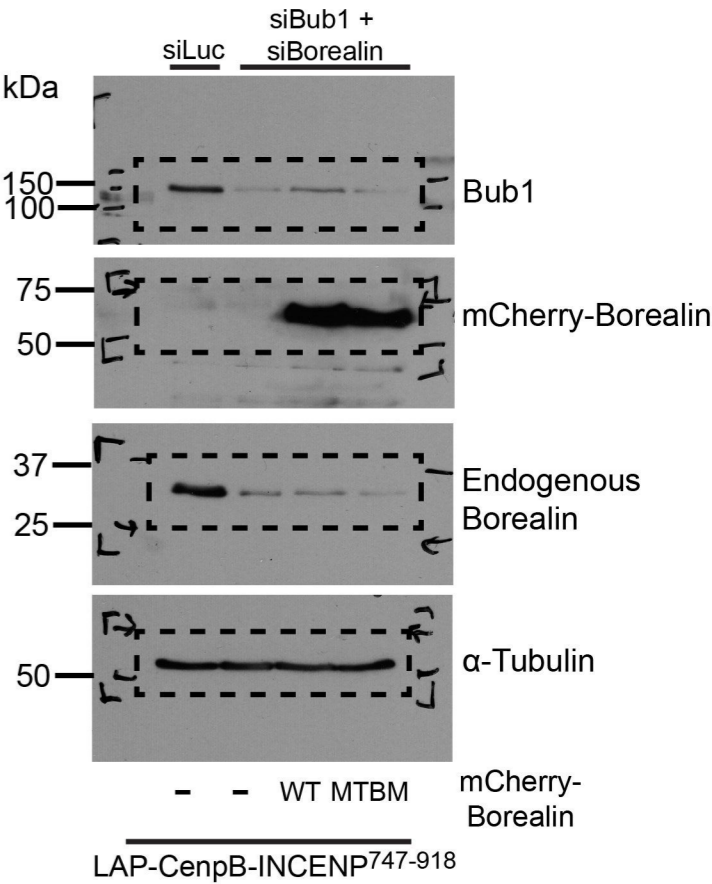

**Supplementary Figure 10: Uncropped scans of blots from Supplement Fig.7E, 7H and 7P.**

**Supplementary References**

67. Cheeseman, I. M., Hori, T., Fukagawa, T. & Desai, A. KNL1 and the CENP-H/ I/K complex coordinately direct kinetochore assembly in vertebrates. *Mol. Biol. Cell* 19, 587–594 (2008).
68. Klein, U. R., Nigg, E. A. & Gruneberg, U. Centromere targeting of the chromosomal passenger complex requires a ternary subcomplex of borealin, survivin, and the N-terminal domain of INCENP. *Mol. Biol. Cell* 17, 2547–2558 (2006).
69. Jia, L., Li, B. & Yu, H. The Bub1-Plk1 kinase complex promotes spindle checkpoint signalling through Cdc20 phosphorylation. *Nat. Commun.* 7, 10818 (2016).
